# Supplementary material for: Glucose unit index (GUI) of permethylated glycans for effective identification of glycans and glycan isomers
Source: Royal Society of Chemistry journal article supplement (doi:10.1039/d0an00314j), 2020-01-01
Supplement: d0an00314j1.pdf [file d0an00314j1.pdf]

**Supporting Information**

**Glucose Unit Index (GUI) of Permethylated Glycans For Effective  
Identification of Glycans and Glycan Isomers**

Sakshi Gautam,<sup>a</sup> Wenjing Peng,<sup>‡a</sup> Byeong Gwan Cho,<sup>‡a</sup> Yifan Huang,<sup>a</sup> Alireza  
Banazadeh,<sup>a</sup> Aiyong Yu,<sup>a</sup> Xue Dong,<sup>a</sup> Yehia Mechref<sup>\*a</sup>

<sup>a</sup> Department of Chemistry and Biochemistry, Texas Tech University, Lubbock, TX 79409-1061,  
United States.

<sup>‡</sup> These authors have contributed equally to the work.

\* Corresponding Author

Department of Chemistry and Biochemistry

Texas Tech University

Lubbock, TX 79409-1061

Email: [yehia.mechref@ttu.edu](mailto:yehia.mechref@ttu.edu)

Tel: 806-742-3059

Fax: 806-742-1289

**Key words:** Glucose unit index, Permethylated glycans, LC-MS/MS, C18 column, Porous  
graphitic carbon

Table-1 GUI of permethylated glycans on C18 Column

| Glycan Structure                                                                    | Glycan code | Theoretical $m/z$ | Observed $m/z$ | Mass accuracy (in ppm) | MS2 ions for structural confirmation                             | Average GUI | SD  |
|-------------------------------------------------------------------------------------|-------------|-------------------|----------------|------------------------|------------------------------------------------------------------|-------------|-----|
| 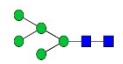   | 2500        | 787.4203          | 787.4177       | 3.3019                 | 627.2<br>755.5<br>1062.6<br>1355.7                               | 4.2         | 0.1 |
|    | 3400        | 807.9336          | 807.9313       | 2.7849                 | 464.3<br>903.1<br>1103.6<br>1321.8<br>1396.8                     | 3.5         | 0.1 |
|                                                                                     |             |                   | 807.9312       | 2.9087                 | 464.2<br>1103.7<br>1321.7<br>1396.6                              | 3.9         | 0.2 |
|    | 4300        | 828.4468          | 828.4444       | 2.8970                 | 636.2<br>1117.6<br>1137.6<br>1192.5<br>1362.7                    | 3.4         | 0.2 |
|  | 2600        | 889.4702          | 889.4672       | 3.3728                 | 391.3<br>876.2<br>915.2<br>1062.7<br>1266.6<br>1355.2<br>1559.8  | 5.2         | 0.1 |
|  | 4310        | 915.4914          | 915.4891       | 2.5123                 | 280.3<br>468.2<br>899.6<br>1103.7<br>1178.6<br>1362.7<br>1570.8  | 4.0         | 0.2 |
|  | 4400        | 930.4967          | 930.4930       | 3.9764                 | 464.2<br>917.3<br>1103.5<br>1142.6<br>1348.7<br>1396.6<br>1566.8 | 3.8         | 0.2 |
|                                                                                     |             |                   | 930.4938       | 3.1166                 | 436.2<br>468.3<br>899.6<br>1103.6<br>1600.8<br>1641.9            | 4.2         | 0.2 |
| Glycan Structure                                                                    | Glycan code | Theoretical $m/z$ | Observed $m/z$ | Mass accuracy (in      | MS2 ions for structural                                          | Average GUI | SD  |

|                                                                                     |               |                    |                 | ppm)        | confirmation                                                                         |                |           |
|-------------------------------------------------------------------------------------|---------------|--------------------|-----------------|-------------|--------------------------------------------------------------------------------------|----------------|-----------|
| 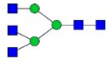   | 5300          | 951.0100           | 951.0070        | 3.1545      | 903.6<br>933.5<br>1089.6<br>1144.7<br>1348.7<br>1607.7                               | 4.5            | 0.2       |
|    | 3401          | 988.5204           | 988.5178        | 2.6302      | 825.7<br>858.6<br>1103.6<br>1307.6<br>1396.7                                         | 4.3            | 0.2       |
|    | 3600          | 1020.5467          | 1020.5432       | 3.4638      | No MS <sup>2</sup>                                                                   | 5.1            | 0.1       |
|    | 4410          | 1017.5413          | 1017.5384       | 2.8500      | 432.2<br>468.2<br>899.7<br>1103.7<br>1275.7<br>1307.7<br>1366.6                      | 4.5            | 0.2       |
|  | 4500          | 1032.5466          | 1032.5437       | 2.8086      | 432.3<br>464.3<br>903.1<br>1307.8<br>1600.9                                          | 4.3            | 0.2       |
|                                                                                     |               |                    | 1032.5427       | 3.7771      | 464.3<br>808.1<br>885.4<br>1307.6<br>1378.6                                          | 4.7            | 0.2       |
|  | 5400          | 1053.0599          | 1053.0568       | 2.9438      | 432.4<br>464.3<br>1089.8<br>1144.7<br>1334.8<br>1348.7<br>1552.8<br>1641.8<br>1845.9 | 4.9            | 0.2       |
|                                                                                     |               |                    | 1053.0562       | 3.5136      | 464.4<br>885.6<br>1089.7<br>1144.8<br>1307.7<br>1348.8<br>1552.9                     | 5.4            | 0.2       |
| <b>Glycan</b>                                                                       | <b>Glycan</b> | <b>Theoretical</b> | <b>Observed</b> | <b>Mass</b> | <b>MS2 ions for</b>                                                                  | <b>Average</b> | <b>SD</b> |

| Structure                                                                           | code        | <i>m/z</i>             | <i>m/z</i>          | accuracy (in ppm)      | structural confirmation                                                                                               | GUI         |     |
|-------------------------------------------------------------------------------------|-------------|------------------------|---------------------|------------------------|-----------------------------------------------------------------------------------------------------------------------|-------------|-----|
| 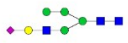   | 3501        | 1090.5703              | 1090.5668           | 3.2093                 | 376.4<br>436.3<br>825.6<br>826.4<br>1030.7<br>1089.9<br>1307.8<br>1355.6<br>1805.0                                    | 5.3         | 0.2 |
|    | 4401        | 741.0583               | 741.0558            | 3.4185                 | 376.2<br>450.3<br>825.6<br>876.3<br>1103.6<br>1293.8<br>1396.6<br>1552.8<br>1668.9                                    | 4.7         | 0.2 |
|    | 4510        | 746.7301               | 746.7281            | 2.6783                 | 464.3<br>844.5<br>1089.7<br>1552.6                                                                                    | 5.0         | 0.2 |
|  | 4411        | 799.0881               | 799.0853            | 3.4623                 | 377.5<br>418.5<br>436.3<br>468.2<br>489.0<br>525.4<br>581.4<br>622.1<br>885.6<br>1178.7<br>1348.7<br>1669.0<br>1761.1 | 5.3         | 0.2 |
|  | 4501        | 809.0916               | 809.0889            | 3.3371                 | 622.4<br>808.4<br>826.6<br>844.5<br>1066.9<br>1089.1<br>1103.6                                                        | 5.1         | 0.2 |
|  | 4610        | 814.7634               | 814.7641            | 0.8591                 | 622.3<br>658.3<br>785.4<br>1066.8<br>1307.7                                                                           | 5.1         | 0.2 |
| Glycan Structure                                                                    | Glycan code | Theoretical <i>m/z</i> | Observed <i>m/z</i> | Mass accuracy (in ppm) | MS2 ions for structural confirmation                                                                                  | Average GUI | SD  |

| 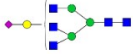   | 5401        | 822.7671               | 822.7639            | 3.8893                 | 849.7<br>883.6<br>899.7<br>1334.7<br>1348.7<br>1538.7                                           | 5.6         | 0.2 |
|-------------------------------------------------------------------------------------|-------------|------------------------|---------------------|------------------------|-------------------------------------------------------------------------------------------------|-------------|-----|
|    | 4511        | 867.1213               | 867.1182            | 3.6135                 | 432.3<br>1066.8<br>1089.7<br>1307.9<br>1441.7<br>1482.6<br>1538.8<br>1552.8<br>1913.9<br>1932.2 | 5.6         | 0.2 |
|    | 5411        | 880.7968               | 880.7948            | 2.3085                 | 468.2<br>808.5<br>867.1<br>899.8<br>1121.4<br>1144.7<br>1334.8<br>1368.5<br>1593.9<br>1710.8    | 6.2         | 0.3 |
|  | 5501        | 890.8004               | 890.7980            | 2.6568                 | 432.2<br>464.4<br>468.0<br>1029.7<br>1089.9<br>1148.4<br>1334.7<br>1552.8                       | 5.9         | 0.3 |
|  | 4502        | 929.4828               | 929.4798            | 3.2635                 | 450.3<br>622.4<br>825.6<br>885.5<br>1029.6<br>1334.7<br>1538.9<br>1831.8<br>1831.8<br>1914.0    | 5.7         | 0.2 |
| Glycan Structure                                                                    | Glycan code | Theoretical <i>m/z</i> | Observed <i>m/z</i> | Mass accuracy (in ppm) | MS2 ions for structural confirmation                                                            | Average GUI | SD  |
|  | 5511        | 948.8301               | 948.8268            | 3.4780                 | 432.3<br>677.4                                                                                  | 6.4         | 0.3 |

|                                                                                     |             |                        |                     |                        | 808.6<br>825.6<br>826.6<br>858.2<br>881.5<br>1538.9<br>1552.9            |             |     |
|-------------------------------------------------------------------------------------|-------------|------------------------|---------------------|------------------------|--------------------------------------------------------------------------|-------------|-----|
| 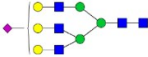   | 5601        | 958.8336               | 958.8306            | 3.1636                 | 432.2<br>464.3<br>668.2<br>843.4<br>1103.8<br>1396.7<br>1538.8<br>1757.0 | 5.4         | 0.2 |
|                                                                                     |             |                        | 958.8303            | 3.4764                 | 464.2<br>825.4<br>1334.4<br>1538.9<br>1800.0<br>1899.8<br>1989.2         | 5.8         | 0.2 |
|   | 4512        | 987.5126               | 987.5096            | 3.0042                 | 468.3<br>580.6<br>825.5<br>1293.6<br>1914.1                              | 6.3         | 0.3 |
|  | 5611        | 1016.8634              | 1016.8597           | 3.6059                 | No MS <sup>2</sup>                                                       | 6.0         | 0.3 |
|                                                                                     |             |                        | 1016.8595           | 3.8025                 | 464.3<br>468.4<br>826.4<br>1089.7<br>1103.7<br>1743.0<br>1784.0          | 6.4         | 0.2 |
|                                                                                     |             |                        | 1016.8604           | 2.9175                 | 826.5<br>919.2<br>1015.8<br>1103.7<br>1468.6<br>1554.8                   | 7.0         | 0.3 |
|  | 5720        | 1022.5351              | 1022.5362           | 1.0432                 | 464.2<br>636.4<br>668.5<br>1030.6<br>1048.7<br>1942.7<br>1988.4          | 6.5         | 0.3 |
| Glycan Structure                                                                    | Glycan code | Theoretical <i>m/z</i> | Observed <i>m/z</i> | Mass accuracy (in ppm) | MS2 ions for structural confirmation                                     | Average GUI | SD  |
|  | 5512        | 802.1680               | 802.1648            | 3.9580                 | 413.3<br>468.4                                                           | 6.9         | 0.3 |

|                                                                                     |                    |                        |                     |                               | 825.5<br>1130.7<br>1988.3                                                 |                    |           |
|-------------------------------------------------------------------------------------|--------------------|------------------------|---------------------|-------------------------------|---------------------------------------------------------------------------|--------------------|-----------|
| 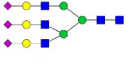   | 5603               | 1199.6161              | 1199.6121           | 3.3344                        | 450.3<br>580.4<br>825.4<br>1464.7<br>1900.0<br>1948.2                     | 6.5                | 0.3       |
|                                                                                     |                    |                        | 1199.6110           | 4.2514                        | 450.3<br>580.3<br>825.5<br>997.6<br>1465.0<br>1900.0                      | 7.0                | 0.0       |
|    | 5712               | 904.2179               | 904.2173            | 0.6359                        | 867.1<br>881.0<br>903.6<br>1284.8<br>1297.8<br>1298.9<br>1320.9<br>1840.6 | 6.5                | 0.3       |
|  | 6702               | 921.9772               | 921.9742            | 3.1996                        | 464.4<br>793.6<br>825.4<br>1015.6<br>1164.6<br>1468.7                     | 6.7                | 0.3       |
|  | 6811               | 926.2310               | 926.2308            | 0.1889                        | 432.1<br>767.1<br>1053.5<br>1537.2<br>1561.4<br>1636.5                    | 6.7                | 0.3       |
|  | 5613               | 943.4864               | 943.4834            | 3.1267                        | 450.3<br>580.4<br>825.6<br>1464.6<br>1899.8                               | 6.9                | 0.3       |
|                                                                                     |                    |                        | 943.4839            | 2.5968                        | 825.6<br>1427.8<br>1900.0<br>1975.1<br>1991.7                             | 7.6                | 0.3       |
| <b>Glycan Structure</b>                                                             | <b>Glycan code</b> | <b>Theoretical m/z</b> | <b>Observed m/z</b> | <b>Mass accuracy (in ppm)</b> | <b>MS2 ions for structural confirmation</b>                               | <b>Average GUI</b> | <b>SD</b> |
|  | 5623               | 987.0087               | 943.4839            | 2.5968                        | 468.2<br>699.0<br>999.5<br>1000.6                                         | 7.4                | 0.3       |

|                                                                                     |             |                        | 987.0056            | 3.0901                 | 418.2<br>624.4<br>793.4<br>811.4<br>825.5<br>999.6<br>1242.7<br>1638.8<br>1714.0  | 7.5         | 0.3 |
|-------------------------------------------------------------------------------------|-------------|------------------------|---------------------|------------------------|-----------------------------------------------------------------------------------|-------------|-----|
| 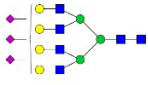   | 6703        | 1012.2706              | 1012.2666           | 3.9268                 | 450.3<br>729.1<br>825.7<br>826.6<br>899.4<br>1478.5<br>1557.0<br>1659.8<br>1763.8 | 7.2         | 0.4 |
|  | 6713        | 1055.7929              | 1055.7898           | 2.9125                 | 523.6<br>825.6<br>867.5<br>899.4<br>1057.7<br>1350.9                              | 7.4         | 0.3 |
|                                                                                     |             |                        | 1055.7915           | 1.3023                 | 825.5<br>1015.6<br>1075.8<br>1636.7<br>1675.5<br>1974.8                           | 7.7         | 0.3 |
|                                                                                     |             |                        | 1055.7902           | 2.5336                 | 825.7<br>844.6<br>1015.3<br>1033.5<br>1039.8<br>1057.7<br>1446.7                  | 8.2         | 0.3 |
|  | 6704        | 1102.5640              | 1102.5603           | 3.3558                 | 450.4<br>580.3<br>825.5<br>1879.6<br>1900.1                                       | 7.7         | 0.4 |
| Glycan Structure                                                                    | Glycan code | Theoretical <i>m/z</i> | Observed <i>m/z</i> | Mass accuracy (in ppm) | MS2 ions for structural confirmation                                              | Average GUI | SD  |
|  | 6714        | 1146.0863              | 1146.0822           | 3.5774                 | 450.2<br>825.5<br>6193.9<br>1864.0<br>1957.3                                      | 8.1         | 0.4 |
|  | 6724        | 1189.6086              | 1189.6056           | 2.5218                 | 420.5                                                                             | 8.5         | 0.4 |



|                                                                                     |             |                        |                     |                        | 450.2<br>580.3<br>598.5<br>793.5<br>811.4<br>999.6<br>1660.0      |             |     |
|-------------------------------------------------------------------------------------|-------------|------------------------|---------------------|------------------------|-------------------------------------------------------------------|-------------|-----|
|                                                                                     |             |                        | 1189.6053           | 2.7740                 | 450.2<br>793.4<br>825.7<br>999.7<br>1826.0                        | 8.7         | 0.4 |
| 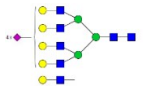   | 7804        | 1214.8705              | 1214.8670           | 2.9015                 | 450.3<br>825.5<br>1094.3<br>1557.0                                | 8.0         | 0.4 |
|                                                                                     |             |                        | 1214.8684           | 1.7492                 | 450.4<br>825.5<br>1278.3<br>1414.2<br>1953.1                      | 8.3         | 0.4 |
|    | 2400        | 1369.7329              | 1369.7295           | 2.4822                 | No MS <sup>2</sup>                                                | 3.5         | 0.1 |
|  | 2700        | 1000.0335              | 1000.0303           | 3.1849                 | 785.2<br>840.4<br>901.9<br>1101.2<br>1689.0<br>1764.0             | 6.0         | 0.1 |
|  | 2800        | 1110.5968              | 1110.5927           | 3.6917                 | 622.3<br>1035.1<br>1252.7<br>1528.1<br>1674.9<br>1713.1<br>1893.0 | 6.8         | 0.1 |
|  | 2900        | 1204.1333              | 808.7661            | 0.8408                 | 599.7<br>729.4<br>826.5<br>1123.4<br>1338.0<br>1411.9<br>1750.4   | 7.5         | 0.1 |
| Glycan Structure                                                                    | Glycan code | Theoretical <i>m/z</i> | Observed <i>m/z</i> | Mass accuracy (in ppm) | MS2 ions for structural confirmation                              | Average GUI | SD  |
|  | 3310        | 792.9283               | 792.9260            | 2.8376                 | 464.3<br>654.2<br>867.3<br>899.5<br>903.6<br>1121.5<br>1366.7     | 3.5         | 0.1 |

|                                                                                     |             |                        |                     |                        | 1396.7                                                                                             |             |     |
|-------------------------------------------------------------------------------------|-------------|------------------------|---------------------|------------------------|----------------------------------------------------------------------------------------------------|-------------|-----|
|                                                                                     |             |                        | 792.9268            | 1.8287                 | 464.2<br>468.3<br>654.3<br>679.2<br>840.2<br>858.5<br>899.6<br>903.2<br>1117.6<br>1325.7<br>1366.7 | 3.7         | 0.1 |
| 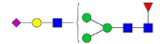   | 3411        | 1075.5650              | 1075.5624           | 2.4173                 | 432.4<br>450.4<br>507.5<br>580.5<br>843.7<br>1103.7<br>1571.0                                      | 4.9         | 0.2 |
|    | 3511        | 1177.6149              | 1177.6097           | 4.4157                 | No MS <sup>2</sup>                                                                                 | 5.8         | 0.2 |
|   | 3610        | 1107.5913              | 1107.5863           | 4.5143                 | 418.2<br>464.4<br>489.2<br>507.3<br>826.6<br>1048.6<br>1352.8                                      | 5.3         | 0.2 |
|  | 4610        | 814.7634               | 814.7641            | 0.8591                 | No MS <sup>2</sup>                                                                                 | 5.1         | 0.2 |
|  | 4611        | 935.1546               | 935.1545            | 0.1069                 | 450.2<br>695.2<br>825.3<br>843.6<br>885.5<br>1075.5<br>1205.6<br>1609.8<br>1947.4                  | 5.7         | 0.3 |
| Glycan Structure                                                                    | Glycan code | Theoretical <i>m/z</i> | Observed <i>m/z</i> | Mass accuracy (in ppm) | MS <sup>2</sup> ions for structural confirmation                                                   | Average GUI | SD  |
|  | 5310        | 1038.0546              | 1038.0516           | 2.8419                 | 468.2<br>1144.6<br>1316.8<br>1348.6<br>1607.8                                                      | 5.1         | 0.2 |
|  | 5410        | 1140.1045              | 1140.1019           | 2.2805                 | 464.2<br>604.2<br>885.4                                                                            | 5.5         | 0.2 |

|                                                                                     |             |                        |                     |                        | 1089.6<br>1294.0<br>1348.8<br>1593.9<br>1628.0                         |             |     |
|-------------------------------------------------------------------------------------|-------------|------------------------|---------------------|------------------------|------------------------------------------------------------------------|-------------|-----|
| 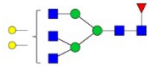   | 5510        | 828.4389               | 828.4363            | 3.0982                 | 858.7<br>844.5<br>858.7<br>885.4<br>1103.6                             | 5.7         | 0.2 |
|    | 5610        | 1344.2043              | 1344.2064           | 1.5995                 | No MS <sup>2</sup>                                                     | 5.9         | 0.3 |
|    | 6410        | 1262.6676              | 1262.6647           | 2.2967                 | No MS <sup>2</sup>                                                     | 5.9         | 0.0 |
|    | 6712        | 1286.9966              | 1286.9926           | 3.1339                 | 825.4<br>1223.7<br>1260.5<br>1728.4<br>1859.0                          | 7.2         | 0.3 |
|                                                                                     |             |                        | 1286.9934           | 2.5123                 | 681.3<br>825.4<br>1039.8<br>1668.7                                     | 7.6         | 0.4 |
|  | 3500        | 909.9835               | 909.9807            | 3.0770                 | No MS <sup>2</sup>                                                     | 4.6         | 0.1 |
|  | 5301        | 760.4092               | 760.4059            | 4.3398                 | 418.3<br>432.3<br>711.4<br>729.4<br>826.5<br>897.2<br>1334.6<br>1348.6 | 5.6         | 0.2 |
| Glycan Structure                                                                    | Glycan code | Theoretical <i>m/z</i> | Observed <i>m/z</i> | Mass accuracy (in ppm) | MS <sup>2</sup> ions for structural confirmation                       | Average GUI | SD  |
|  | 5500        | 770.4091               | 770.4061            | 3.9373                 | No MS <sup>2</sup>                                                     | 5.3         | 0.2 |

| 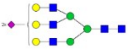   | 5602        | 1079.2249              | 1079.2209           | 3.6755                 | 432.3<br>645.2<br>825.4<br>1103.6<br>1314.3<br>1464.8<br>1744.0           | 6.3         | 0.1 |
|-------------------------------------------------------------------------------------|-------------|------------------------|---------------------|------------------------|---------------------------------------------------------------------------|-------------|-----|
|                                                                                     |             |                        | 1079.2213           | 3.3048                 | 464.3<br>580.3<br>825.5<br>1123.2<br>1586.9<br>1600.1<br>1743.0<br>1783.7 | 6.6         | 0.3 |
|                                                                                     |             |                        | 1079.2201           | 4.4168                 | 450.2<br>464.1<br>825.5<br>1029.3<br>1538.8<br>1586.7<br>1743.8<br>1783.9 | 7.1         | 0.3 |
|  | 5711        | 813.9245               | 813.9243            | 0.2457                 | No MS <sup>2</sup>                                                        | 6.2         | 0.3 |
|  | 6701        | 831.6837               | 831.6815            | 2.6753                 | 450.1<br>521.1<br>604.0<br>1089.7<br>1293.6<br>1538.7<br>1742.9           | 6.2         | 0.2 |
| Glycan Structure                                                                    | Glycan code | Theoretical <i>m/z</i> | Observed <i>m/z</i> | Mass accuracy (in ppm) | MS <sup>2</sup> ions for structural confirmation                          | Average GUI | SD  |

| 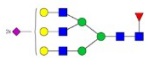   | 5612        | 1137.2546              | 1137.2509           | 3.2534                 | 432.3<br>464.3<br>825.6<br>1040.0<br>1103.6<br>1243.5<br>1538.8<br>1654.8<br>1714.0<br>1783.8 | 6.6         | 0.4 |
|-------------------------------------------------------------------------------------|-------------|------------------------|---------------------|------------------------|-----------------------------------------------------------------------------------------------|-------------|-----|
|                                                                                     |             |                        | 1137.2511           | 3.0776                 | 432.3<br>464.2<br>825.6<br>997.2<br>1089.6<br>1293.9<br>1538.9<br>1572.8<br>1713.6            | 6.7         | 0.4 |
|                                                                                     |             |                        | 1137.2507           | 3.4293                 | No MS <sup>2</sup>                                                                            | 7.0         | 0.4 |
|                                                                                     |             |                        | 1137.2504           | 3.6931                 | No MS <sup>2</sup>                                                                            | 7.1         | 0.3 |
|                                                                                     |             |                        | 1137.2517           | 2.5500                 | 432.2<br>825.5<br>1053.3<br>1089.6<br>1284.8<br>1293.8<br>1742.9<br>1899.9                    | 7.6         | 0.3 |
|  | 6711        | 1166.6054              | 1166.6022           | 2.7430                 | No MS <sup>2</sup>                                                                            | 6.7         | 0.3 |
|                                                                                     |             |                        | 1166.6034           | 1.7144                 |                                                                                               | 6.9         | 0.3 |
|                                                                                     |             |                        | 1166.6005           | 4.2002                 |                                                                                               | 7.1         | 0.4 |
| Glycan Structure                                                                    | Glycan code | Theoretical <i>m/z</i> | Observed <i>m/z</i> | Mass accuracy (in ppm) | MS2 ions for structural confirmation                                                          | Average GUI | SD  |

|                                                                                     |                    |                        |                     |                               |                                                                                              |                    |           |
|-------------------------------------------------------------------------------------|--------------------|------------------------|---------------------|-------------------------------|----------------------------------------------------------------------------------------------|--------------------|-----------|
| 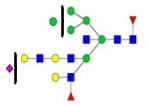   | 6921               | 1360.7017              | 1360.7047           | 2.2292                        | 450.4<br>825.3<br>1007.1<br>1161.5<br>1215.6                                                 | 7.2                | 0.4       |
|  | 7813               | 1168.0994              | 1168.0973           | 1.7978                        | 450.4<br>681.4<br>695.5<br>825.7<br>1169.7<br>1279.9<br>1432.4<br>1465.7<br>1520.4<br>1924.2 | 8.1                | 0.3       |
|                                                                                     |                    |                        | 1168.0952           | 3.5956                        | 464.4<br>825.4<br>1043.4<br>1075.9<br>1432.7<br>1475.0<br>1914.5                             | 8.3                | 0.3       |
|                                                                                     |                    |                        | 1168.0947           | 4.0236                        | 825.5<br>1103.4<br>1300.5<br>1478.8<br>1511.3<br>1565.4<br>1692.7                            | 8.6                | 0.3       |
|  | 3410               | 894.9782               | 894.9820            | 4.3018                        | 885.4<br>1085.8<br>1334.6<br>1552.9<br>1600.5                                                | 3.7                | 0.1       |
|                                                                                     |                    |                        | 894.9754            | 3.0727                        | 840.4<br>885.8<br>1076.1<br>1103.4<br>1325.5                                                 | 4.2                | 0.1       |
| <b>Glycan Structure</b>                                                             | <b>Glycan code</b> | <b>Theoretical m/z</b> | <b>Observed m/z</b> | <b>Mass accuracy (in ppm)</b> | <b>MS2 ions for structural confirmation</b>                                                  | <b>Average GUI</b> | <b>SD</b> |

|                                                                                     |                    |                               |                            |                               |                                                                          |                    |           |
|-------------------------------------------------------------------------------------|--------------------|-------------------------------|----------------------------|-------------------------------|--------------------------------------------------------------------------|--------------------|-----------|
| 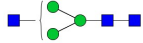   | 3300               | 705.8837                      | 705.8821                   | 2.1958                        | 294.3<br>613.1<br>654.1<br>858.6<br>876.3<br>890.4<br>1117.5<br>1151.6   | 3.0                | 0.1       |
|    | 5502               | 1516.2835                     | 1516.2778                  | 3.7262                        | No MS <sup>2</sup>                                                       | 5.7                | 0.3       |
|    | 5604               | 1320.0073                     | 1320.0024                  | 3.7374                        | 450.3<br>589.2<br>654.1<br>794.7<br>825.4<br>1057.8<br>1409.9            | 7.4                | 0.1       |
|                                                                                     |                    |                               | 1320.0035                  | 2.9040                        | 811.4<br>825.5<br>871.3<br>1053.6<br>1250.8                              | 7.5                | 0.0       |
|  | 6612               | 1218.9634                     | 1218.9628                  | 0.4649                        | No MS <sup>2</sup>                                                       | 7.2                | 0.4       |
|  | 6613               | 1339.3546                     | 1339.3517                  | 2.1652                        | 450.4<br>468.4<br>715.5<br>825.5<br>1062.5<br>1323.4<br>1377.2<br>1906.2 | 7.6                | 0.4       |
|  | 6734               | 1233.1309                     | 1233.1298                  | 0.8920                        | No MS <sup>2</sup>                                                       | 9.2                | 0.3       |
| <b>Glycan Structure</b>                                                             | <b>Glycan code</b> | <b>Theoretical <i>m/z</i></b> | <b>Observed <i>m/z</i></b> | <b>Mass accuracy (in ppm)</b> | <b>MS2 ions for structural confirmation</b>                              | <b>Average GUI</b> | <b>SD</b> |
|  | 7803               | 1124.5771                     | 1124.5756                  | 1.3338                        | No MS <sup>2</sup>                                                       | 7.5                | 0.2       |

|                                                                                     |             |                        | 1124.5732           | 3.4680                 | 418.4<br>450.3<br>464.3<br>825.6<br>899.6<br>1098.8<br>1107.4<br>1464.7<br>1502.4<br>1669.0<br>1927.0 | 7.7         | 0.2 |
|-------------------------------------------------------------------------------------|-------------|------------------------|---------------------|------------------------|-------------------------------------------------------------------------------------------------------|-------------|-----|
|                                                                                     |             |                        | 1124.5729           | 3.7347                 | 450.3<br>464.2<br>825.5<br>919.4<br>1057.7<br>1107.9<br>1547.9<br>1914.6                              | 7.9         | 0.2 |
| 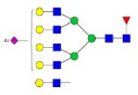   | 7814        | 1258.3928              | 1258.3900           | 2.2449                 | No MS <sup>2</sup>                                                                                    | 8.5         | 0.3 |
|                                                                                     |             |                        | 1258.3895           | 2.6423                 |                                                                                                       | 8.8         | 0.3 |
|  | 8904        | 1327.1771              | 1327.1730           | 3.0516                 | 899.7<br>1110.6<br>1193.1<br>1260.1<br>1270.8                                                         | 8.4         | 0.3 |
|                                                                                     |             |                        | 1327.1724           | 3.5037                 | No MS <sup>2</sup>                                                                                    | 8.7         | 0.3 |
|  | 3510        | 997.0281               | 997.0311            | 3.0591                 | No MS <sup>2</sup>                                                                                    | 4.4         | 0.1 |
|  | 4602        | 997.5161               | 997.5121            | 4.0100                 | 418.2<br>468.1<br>654.0<br>826.6<br>1075.6<br>1293.9                                                  | 6.5         | 0.3 |
|  | 5721        | 1142.9264              | 1142.9258           | 0.4958                 | No MS <sup>2</sup>                                                                                    | 6.6         | 0.3 |
|                                                                                     |             |                        | 1142.9253           | 0.9333                 |                                                                                                       | 6.7         | 0.3 |
|                                                                                     |             |                        | 1142.9257           | 0.5833                 |                                                                                                       | 6.9         | 0.3 |
| Glycan Structure                                                                    | Glycan code | Theoretical <i>m/z</i> | Observed <i>m/z</i> | Mass accuracy (in ppm) | MS <sup>2</sup> ions for structural confirmation                                                      | Average GUI | SD  |
|  | 5820        | 1090.5684              | 1090.5739           | 5.0432                 | No MS <sup>2</sup>                                                                                    | 6.1         | 0.3 |



|                                                                                   |      |           |           |        |                                                                                                |     |     |
|-----------------------------------------------------------------------------------|------|-----------|-----------|--------|------------------------------------------------------------------------------------------------|-----|-----|
| 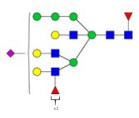 | 5831 | 1268.9894 | 1268.9923 | 2.3116 | 665.7<br>826.6<br>1043.6<br>1063.6<br>1077.7<br>1184.8<br>1449.4<br>1612.9<br>1717.0<br>1821.9 | 7.0 | 0.3 |
|-----------------------------------------------------------------------------------|------|-----------|-----------|--------|------------------------------------------------------------------------------------------------|-----|-----|

Table-2 GUI of permethylated glycans on PGC Column

| Glycan Structure                                                                    | Glycan code | Theoretical <i>m/z</i> | Observed <i>m/z</i> | Mass accuracy (in ppm) | MS2 ions for structural confirmation                            | Average GUI | SD  |
|-------------------------------------------------------------------------------------|-------------|------------------------|---------------------|------------------------|-----------------------------------------------------------------|-------------|-----|
| 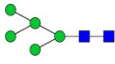   | 2500        | 787.4203               | 787.4191            | 1.5240                 | 636.7<br>844.6<br>1062.5<br>1137.6<br>1355.7                    | 5.1         | 0.1 |
|    | 3300        | 705.8837               | 705.8831            | 0.8500                 | 858.5<br>899.6<br>947.5<br>1117.7<br>1151.6<br>1192.7           | 4.3         | 0.1 |
|    | 3400        | 807.9336               | 807.9332            | 0.4951                 | 464.5<br>858.6<br>1321.7<br>1378.8                              | 4.9         | 0.1 |
|    | 4300        | 828.4468               | 828.4461            | 0.8450                 | 654.5<br>899.6<br>1103.6<br>1192.7<br>1362.7<br>1396.7          | 4.9         | 0.2 |
|  | 2600        | 889.4702               | 889.4693            | 1.0118                 | 604.5<br>858.7<br>1355.8<br>1559.8                              | 4.8         | 0.2 |
|                                                                                     |             |                        | 889.4695            | 0.7870                 | 1062.6<br>1119.9<br>1151.6<br>1266.9<br>1341.4<br>1559.8        | 5.1         | 0.2 |
|  | 4310        | 915.4914               | 915.4921            | 0.7646                 | 468.4<br>844.5<br>899.5<br>1071.6<br>1103.6<br>1362.7<br>1570.7 | 6.5         | 0.2 |
|  | 4400        | 930.4967               | 930.4961            | 0.6448                 | 464.4<br>1307.8<br>1396.8<br>1566.8                             | 5.2         | 0.1 |
|  | 5300        | 951.0100               | 951.0101            | 0.1052                 | 432.4<br>794.2<br>1089.6<br>1144.6<br>1348.7                    | 6.2         | 0.2 |

| Glycan Structure                                                                    | Glycan code | Theoretical <i>m/z</i> | Observed <i>m/z</i> | Mass accuracy (in ppm) | MS2 ions for structural confirmation                                                | Average GUI | SD  |
|-------------------------------------------------------------------------------------|-------------|------------------------|---------------------|------------------------|-------------------------------------------------------------------------------------|-------------|-----|
| 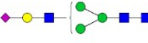   | 3401        | 988.5204               | 988.5192            | 1.2139                 | 825.5<br>858.5<br>1103.6<br>1151.7<br>1307.7<br>1600.9<br>1682.9<br>1739.9          | 5.8         | 0.3 |
|                                                                                     |             |                        | 988.5203            | 0.1012                 | 826.4<br>1103.4<br>1151.7<br>1219.8<br>1307.7<br>1396.5<br>1600.8<br>1682.8         | 6.2         | 0.3 |
|    | 2800        | 1110.5968              | 1110.5942           | 2.3411                 | No MS <sup>2</sup>                                                                  | 4.8         | 0.1 |
|   |             |                        | 1110.6000           | 2.8813                 |                                                                                     | 5.0         | 0.1 |
|  |             |                        | 1110.6014           | 4.1419                 |                                                                                     | 5.4         | 0.2 |
|  | 3600        | 1020.5467              | 1020.5464           | 0.2940                 | No MS <sup>2</sup>                                                                  | 5.7         | 0.1 |
|  | 4410        | 1017.5413              | 1017.5422           | 0.8845                 | 464.4<br>604.3<br>899.6<br>1071.5<br>1103.6<br>1307.7<br>1348.6<br>1366.7<br>1566.8 | 6.7         | 0.2 |
|  |             |                        | 1017.5417           | 0.3931                 | 464.3<br>899.6<br>1103.6<br>1307.6<br>1348.7<br>1566.9<br>1775.1<br>1816.1          | 7.0         | 0.1 |

| Glycan Structure                                                                    | Glycan code | Theoretical $m/z$ | Observed $m/z$ | Mass accuracy (in ppm) | MS2 ions for structural confirmation                                       | Average GUI | SD  |
|-------------------------------------------------------------------------------------|-------------|-------------------|----------------|------------------------|----------------------------------------------------------------------------|-------------|-----|
| 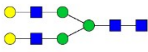   | 4500        | 1032.5466         | 1032.5461      | 0.4842                 | 432.3<br>885.0<br>1071.6<br>1307.8<br>1382.9<br>1552.7<br>1770.8           | 5.3         | 0.2 |
|                                                                                     |             |                   | 1032.5459      | 0.6779                 | 432.3<br>464.2<br>1089.5<br>1103.7<br>1307.6<br>1552.7<br>1600.8<br>1770.9 | 6.0         | 0.3 |
|                                                                                     |             |                   | 1032.5470      | 0.3874                 | No MS <sup>2</sup>                                                         | 7.0         | 0.1 |
|    | 5400        | 1053.0599         | 1053.0596      | 0.2849                 | 464.5<br>826.4<br>1089.5<br>1348.7<br>1382.8<br>1552.8<br>1642.0           | 6.4         | 0.2 |
|  | 3501        | 1090.5703         | 1090.5703      | 0.0000                 | 825.5<br>1062.6<br>1307.7<br>1511.7<br>1600.8                              | 6.5         | 0.2 |
|  | 4401        | 741.0583          | 741.0574       | 1.2145                 | No MS <sup>2</sup>                                                         | 6.3         | 0.2 |
|                                                                                     |             |                   | 741.0580       | 0.4048                 | 598.4<br>825.5<br>899.7<br>1103.4<br>1192.6<br>1348.6<br>1396.7<br>1552.8  | 6.6         | 0.2 |
|  | 5301        | 1140.1102         | 1140.1044      | 5.0872                 | 468.3<br>636.1<br>862.4<br>1334.6<br>1316.7<br>1348.6<br>1350.9            | 8.5         | 0.2 |

| Glycan Structure                                                                    | Glycan code | Theoretical <i>m/z</i> | Observed <i>m/z</i> | Mass accuracy (in ppm) | MS2 ions for structural confirmation                                                 | Average GUI | SD  |
|-------------------------------------------------------------------------------------|-------------|------------------------|---------------------|------------------------|--------------------------------------------------------------------------------------|-------------|-----|
| 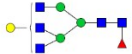   | 5410        | 1140.1045              | 1140.1044           | 0.0877                 | 464.4<br>885.9<br>1089.5<br>1144.8<br>1348.7<br>1552.7<br>1554.8<br>1556.7<br>1593.9 | 8.7         | 0.1 |
|                                                                                     |             |                        | 1140.1036           | 0.7894                 | 464.2<br>1089.6<br>1144.6<br>1316.6<br>1348.7<br>1552.8<br>1784.0<br>1812.0          | 9.1         | 0.2 |
|    | 5500        | 770.4091               | 770.4093            | 0.2596                 | No MS <sup>2</sup>                                                                   | 7.0         | 0.2 |
|  | 4411        | 799.0881               | 799.0877            | 0.5006                 | No MS <sup>2</sup>                                                                   | 7.8         | 0.5 |
|                                                                                     |             |                        | 799.0884            | 0.3754                 | 418.4<br>468.3<br>825.4<br>1348.7<br>1552.8<br>1760.7                                | 8.2         | 0.2 |
|  | 4501        | 809.0916               | 809.0914            | 0.2472                 | 464.5<br>711.6<br>1066.9<br>1334.8<br>1552.9                                         | 6.3         | 0.4 |
|                                                                                     |             |                        | 809.0914            | 0.2472                 | 464.3<br>1067.0<br>1293.6<br>1552.7<br>1668.7<br>1757.9                              | 6.9         | 0.3 |
|  | 4610        | 814.7634               | 814.7664            | 3.6821                 | 525.2<br>636.4<br>645.1<br>699.0<br>785.1<br>794.7<br>1307.8                         | 6.9         | 0.2 |

| Glycan Structure                                                                    | Glycan code | Theoretical <i>m/z</i> | Observed <i>m/z</i> | Mass accuracy (in ppm) | MS2 ions for structural confirmation                                       | Average GUI | SD  |
|-------------------------------------------------------------------------------------|-------------|------------------------|---------------------|------------------------|----------------------------------------------------------------------------|-------------|-----|
|                                                                                     |             |                        | 814.7661            | 3.3138                 | No MS <sup>2</sup>                                                         | 7.4         | 0.3 |
| 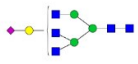   | 5401        | 822.7671               | 822.7676            | 0.6077                 | 450.2<br>899.7<br>1087.7<br>1348.7<br>1593.8                               | 7.3         | 0.3 |
|                                                                                     |             |                        | 822.7663            | 0.9723                 | No MS <sup>2</sup>                                                         | 7.5         | 0.1 |
|  | 4511        | 867.1213               | 867.1209            | 0.4613                 | No MS <sup>2</sup>                                                         | 7.0         | 0.4 |
|                                                                                     |             |                        | 867.1218            | 0.5766                 | 468.2<br>654.5<br>1066.7<br>1307.7<br>1552.8<br>1756.9<br>1832.0<br>1948.0 | 7.5         | 0.3 |
|                                                                                     |             |                        | 867.1215            | 0.2306                 | 468.4<br>825.5<br>1066.9<br>1334.7<br>1552.9<br>1586.9<br>1668.9<br>1914.2 | 8.5         | 0.2 |
|  | 5411        | 880.7968               | 880.7965            | 0.3406                 | 436.3<br>468.4<br>825.4<br>899.8<br>1334.6<br>1538.8<br>1797.9<br>1914.0   | 9.0         | 0.2 |
|                                                                                     |             |                        | 880.7972            | 0.4541                 | 794.6<br>825.4<br>1348.6<br>1593.7<br>1710.9<br>1797.9<br>1815.7<br>1988.2 | 9.6         | 0.2 |
|  | 5501        | 890.8004               | 890.8008            | 0.4490                 | 464.4<br>849.8                                                             | 7.7         | 0.2 |

| Glycan Structure                                                                    | Glycan code | Theoretical <i>m/z</i> | Observed <i>m/z</i> | Mass accuracy (in ppm) | MS2 ions for structural confirmation                                              | Average GUI | SD  |
|-------------------------------------------------------------------------------------|-------------|------------------------|---------------------|------------------------|-----------------------------------------------------------------------------------|-------------|-----|
|                                                                                     |             |                        |                     |                        | 1148.3<br>1348.8<br>1464.8<br>1552.7                                              |             |     |
|    | 4502        | 929.4828               | 929.4826            | 0.2152                 | 598.5<br>825.6<br>844.6<br>1293.7<br>1334.8<br>1668.6<br>1962.6                   | 6.3         | 0.2 |
|    |             |                        | 929.4843            | 1.6138                 | 450.1<br>825.5<br>1089.5<br>1293.5<br>1334.5<br>1538.8                            | 7.1         | 0.3 |
|    |             |                        | 929.4831            | 0.3228                 | No MS <sup>2</sup>                                                                | 7.8         | 0.3 |
|   |             |                        | 929.4824            | 0.4303                 | 450.3<br>825.5<br>1293.7<br>1334.8<br>1538.8<br>1914.1                            | 8.3         | 0.0 |
|  | 4611        | 935.1546               | 935.1587            | 4.3843                 | 432.2<br>622.3<br>672.0<br>825.3<br>833.7<br>889.2<br>899.4<br>1293.7<br>1609.9   | 7.1         | 0.3 |
|                                                                                     |             |                        | 935.1591            | 4.8120                 | 636.4<br>803.7<br>825.5<br>876.4<br>997.3<br>1015.5<br>1205.9<br>1293.5<br>1334.7 | 7.9         | 0.2 |
|  | 5511        | 948.8301               | 948.8307            | 0.6324                 | 464.3<br>826.4<br>905.4<br>1030.2<br>1091.7<br>1314.6<br>1334.7<br>1524.7         | 9.9         | 0.3 |

| Glycan Structure | Glycan code | Theoretical <i>m/z</i> | Observed <i>m/z</i> | Mass accuracy (in ppm) | MS2 ions for structural confirmation                                                                   | Average GUI | SD  |
|------------------|-------------|------------------------|---------------------|------------------------|--------------------------------------------------------------------------------------------------------|-------------|-----|
|                  |             |                        |                     |                        | 1540.9<br>1552.9<br>1580.1<br>1913.8                                                                   |             |     |
|                  | 5601        | 958.8336               | 958.8345            | 0.9386                 | 464.2<br>645.5<br>825.6<br>844.6<br>1069.4<br>1128.6<br>1219.2<br>1307.9<br>1538.7<br>1757.9<br>1783.9 | 9.2         | 0.2 |
|                  | 4512        | 987.5126               | 987.5134            | 0.8101                 | No MS <sup>2</sup>                                                                                     | 6.7         | 0.2 |
|                  |             |                        | 987.5134            | 0.8101                 | 793.4<br>811.6<br>825.7<br>1000.5<br>1089.6<br>1240.4<br>1263.7<br>1293.8<br>1334.6                    | 7.2         | 0.1 |
|                  | 4512        | 987.5126               | 987.5128            | 0.2025                 | 468.3<br>599.4<br>825.5<br>1293.1<br>1311.4<br>1668.7<br>1743.2                                        | 7.7         | 0.2 |
|                  |             |                        | 987.5122            | 0.4051                 | 468.7<br>825.6<br>1069.3<br>1089.5<br>1293.6<br>1334.6<br>1668.9<br>1914.0                             | 8.6         | 0.2 |
|                  |             |                        | 987.5135            | 0.9114                 | 450.3<br>468.2<br>825.5<br>844.6<br>1069.1<br>1089.7<br>1293.4<br>1668.9<br>1743.9                     | 9.4         | 0.2 |



| Glycan Structure                                                                    | Glycan code | Theoretical <i>m/z</i> | Observed <i>m/z</i> | Mass accuracy (in ppm) | MS2 ions for structural confirmation                                                                             | Average GUI | SD  |
|-------------------------------------------------------------------------------------|-------------|------------------------|---------------------|------------------------|------------------------------------------------------------------------------------------------------------------|-------------|-----|
| 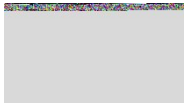   | 5712        | 904.2179               | 904.2211            | 3.5390                 | 1801.8<br>1932.2<br>418.2<br>464.3<br>825.7<br>903.5<br>1079.9<br>1169.5<br>1334.6<br>1555.0<br>1730.0<br>1914.0 | 8.8         | 0.3 |
|                                                                                     |             |                        | 904.2212            | 3.6496                 | 848.8<br>871.0<br>887.4<br>903.6<br>1103.1                                                                       | 9.5         | 0.2 |
|  | 5613        | 943.4864               | 943.4860            | 0.4240                 | No MS <sup>2</sup>                                                                                               | 8.9         | 0.5 |
|                                                                                     |             |                        | 943.4886            | 2.3318                 | 450.4<br>793.4<br>984.5<br>1038.5<br>1132.9<br>1423.9<br>1451.3<br>1474.3<br>1510.9<br>1551.9                    | 9.6         | 0.6 |
|                                                                                     |             |                        | 943.4869            | 0.5299                 | 826.5<br>844.0<br>867.8<br>881.7<br>899.2<br>1242.6<br>1650.9<br>1684.0<br>1696.8<br>1858.9<br>1988.2            | 10.0        | 0.2 |

|                                                                                     |             |                        | 943.4853                                                                            | 1.1659                 | 418.2<br>531.6<br>640.1<br>661.4<br>695.4<br>825.5<br>1334.7<br>1447.9<br>1526.8<br>1683.9<br>1900.4<br>1948.0 | 10.3               | 0.4 |
|-------------------------------------------------------------------------------------|-------------|------------------------|-------------------------------------------------------------------------------------|------------------------|----------------------------------------------------------------------------------------------------------------|--------------------|-----|
| Glycan Structure                                                                    | Glycan code | Theoretical <i>m/z</i> | Observed <i>m/z</i>                                                                 | Mass accuracy (in ppm) | MS2 ions for structural confirmation                                                                           | Average GUI        | SD  |
| 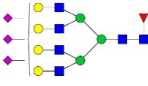   | 6713        | 1055.7929              | 1055.7922                                                                           | 0.6630                 | 825.6<br>1026.0<br>1057.6<br>1282.7<br>1446.5<br>1604.6                                                        | 10.3               | 0.2 |
|                                                                                     |             |                        | 1055.7940                                                                           | 1.0419                 | No MS <sup>2</sup>                                                                                             | 11.7               | 0.0 |
|                                                                                     |             |                        | 1055.7944                                                                           | 1.4207                 | No MS <sup>2</sup>                                                                                             | 12.4               | 0.0 |
|  | 6714        | 1146.0863              | 1146.0851                                                                           | 1.0470                 | 517.4<br>798.6<br>1071.6<br>1446.7<br>1696.9<br>1887.9                                                         | 10.2               | 0.2 |
|                                                                                     |             |                        | 1146.0879                                                                           | 1.3961                 | No MS <sup>2</sup>                                                                                             | 11.4               | 0.0 |
|                                                                                     |             |                        | 1146.0864                                                                           | 0.0873                 | No MS <sup>2</sup>                                                                                             | 12.3               | 0.0 |
|  | 2700        | 1000.0335              | 1000.0325                                                                           | 1.0000                 | No MS <sup>2</sup>                                                                                             | 4.8                | 0.3 |
|  |             |                        | 1000.0317                                                                           | 1.7999                 | 711.2<br>821.5<br>1470.7<br>1688.8<br>1764.0                                                                   | 5.1                | 0.3 |
|  |             |                        | 1000.0317                                                                           | 1.7999                 | No MS <sup>2</sup>                                                                                             | 5.6                | 0.6 |
|  | 2900        | 1204.1333              | 1204.1332                                                                           | 0.0830                 | 400.2<br>794.7<br>915.6<br>1879.1                                                                              | 5.2                | 0.4 |
|  | 3310        | 792.9283               | 792.9275                                                                            | 1.0089                 | 436.3<br>654.4<br>858.5<br>899.5<br>1117.5                                                                     | 6.0                | 0.1 |
|                                                                                     |             |                        |  | 792.9290               | 0.8828                                                                                                         | No MS <sup>2</sup> | 6.6 |

| 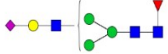   | 3411        | 1075.5650       | 1075.5674    | 2.2314                 | 468.4<br>636.6<br>825.5<br>858.5<br>1103.6<br>1307.6<br>1570.8<br>1682.8<br>1774.7   | 7.4         | 0.3 |
|-------------------------------------------------------------------------------------|-------------|-----------------|--------------|------------------------|--------------------------------------------------------------------------------------|-------------|-----|
|    | 3610        | 1107.5913       | 1107.5967    | 4.8754                 | 450.4<br>432.5<br>1089.8<br>1107.6                                                   | 6.6         | 0.1 |
| Glycan Structure                                                                    | Glycan code | Theoretical m/z | Observed m/z | Mass accuracy (in ppm) | MS2 ions for structural confirmation                                                 | Average GUI | SD  |
|   | 4510        | 1119.5912       | 1119.5933    | 1.8757                 | No MS <sup>2</sup>                                                                   | 6.6         | 0.3 |
|                                                                                     |             |                 | 1119.5920    | 0.7145                 | 844.8<br>885.8<br>903.6<br>1071.3<br>1087.9<br>1121.5<br>1771.0                      | 7.1         | 0.4 |
|                                                                                     |             |                 | 1119.5939    | 2.4116                 | 432.2<br>464.3<br>1087.4<br>1103.6<br>1121.4<br>1307.7<br>1552.8<br>1770.9           | 8.7         | 0.2 |
|  | 5310        | 1038.0546       | 1038.0543    | 0.2890                 | 468.3<br>899.4<br>1089.6<br>1144.6<br>1316.7<br>1348.7<br>1557.0<br>1607.8<br>1816.0 | 8.5         | 0.2 |
|                                                                                     |             |                 | 1038.0569    | 2.2157                 | 468.2<br>885.4<br>1037.3<br>1144.6<br>1348.7<br>1815.8                               | 9.0         | 0.2 |
|  | 5410        | 1140.1045       | 1140.1039    | 0.5263                 | 436.3<br>885.6<br>1091.8<br>1350.8<br>1609.9                                         | 8.7         | 0.1 |
|                                                                                     |             |                 | 1140.1033    | 1.0525                 | 432.2                                                                                | 9.1         | 0.2 |

|                                                                                     |             |                        |                     |                        | 1146.7<br>1350.7<br>1609.9                                       |             |     |
|-------------------------------------------------------------------------------------|-------------|------------------------|---------------------|------------------------|------------------------------------------------------------------|-------------|-----|
| 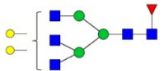   | 5510        | 1242.1544              | 1242.1545           | 0.0805                 | No MS <sup>2</sup>                                               | 7.4         | 0.3 |
|                                                                                     |             |                        | 1242.1552           | 0.6440                 | 464.3<br>776.8<br>1089.4<br>1348.7<br>1520.7<br>1552.7<br>1580.0 | 9.2         | 0.2 |
| Glycan Structure                                                                    | Glycan code | Theoretical <i>m/z</i> | Observed <i>m/z</i> | Mass accuracy (in ppm) | MS2 ions for structural confirmation                             | Average GUI | SD  |
|  | 5603        | 1199.6161              | 1199.6157           | 0.3334                 | 825.5<br>1052.6<br>1201.6<br>1320.8                              | 8.3         | 0.1 |
|                                                                                     |             |                        | 1199.6215           | 4.5014                 | 450.3<br>825.4<br>1201.4<br>1260.5<br>1465.8                     | 8.8         | 0.3 |
|                                                                                     |             |                        | 1199.6189           | 2.3341                 | 450.5<br>645.8<br>825.4<br>1465.4<br>1899.9<br>1948.4            | 9.3         | 0.4 |
|                                                                                     |             |                        | 1199.6168           | 0.5835                 | 450.4<br>825.7<br>1039.7<br>1465.7<br>1948.2                     | 9.8         | 0.3 |
|  | 5604        | 1320.0073              | 1320.0127           | 4.0909                 | 825.6<br>997.5<br>1087.0<br>1186.6<br>1543.2<br>1646.0<br>1986.1 | 8.0         | 0.1 |
|                                                                                     |             |                        | 1320.0116           | 3.2575                 | 825.6<br>830.7<br>998.6<br>1646.0<br>1882.8                      | 8.2         | 0.1 |
|                                                                                     |             |                        | 1320.0115           | 3.1818                 | 825.5<br>829.7<br>997.7<br>1187.6<br>1817.7<br>1948.0            | 8.5         | 0.1 |

|                                                                                     |             |                        | 1320.0131           | 4.3939                 | 825.7<br>1186.8<br>1320.1<br>1645.9<br>1901.2                           | 8.9         | 0.2 |
|-------------------------------------------------------------------------------------|-------------|------------------------|---------------------|------------------------|-------------------------------------------------------------------------|-------------|-----|
|                                                                                     |             |                        | 1320.0131           | 4.3939                 | 825.6<br>1029.7<br>1186.8<br>1605.0<br>1646.0<br>1758.0<br>1886.2       | 9.7         | 0.1 |
| Glycan Structure                                                                    | Glycan code | Theoretical <i>m/z</i> | Observed <i>m/z</i> | Mass accuracy (in ppm) | MS2 ions for structural confirmation                                    | Average GUI | SD  |
| 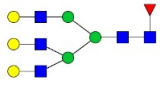   | 5610        | 1344.2043              | 1344.2104           | 4.5380                 | No MS <sup>2</sup>                                                      | 7.8         | 0.1 |
|   | 5623        | 1321.3510              | 1321.3520           | 0.7568                 | 468.3<br>793.5<br>825.4<br>875.4<br>903.3<br>1017.6<br>1107.8<br>1300.7 | 10.5        | 0.4 |
|  | 6703        | 1012.2706              | 1012.2713           | 0.6915                 | 825.5<br>1164.4<br>1225.3<br>1355.8<br>1464.8<br>1613.5                 | 10.7        | 0.4 |
|                                                                                     |             |                        | 1012.2695           | 1.0867                 | No MS <sup>2</sup>                                                      | 11.8        | 0.0 |
|                                                                                     |             |                        | 1012.2720           | 1.3830                 | No MS <sup>2</sup>                                                      | 12.7        | 0.0 |
|  | 6704        | 1102.5640              | 1102.5664           | 2.1767                 | 825.5<br>1037.7<br>1205.9<br>1270.2<br>1604.6<br>1767.6                 | 10.4        | 0.2 |
|                                                                                     |             |                        | 1102.5648           | 0.7256                 | 450.3<br>825.5<br>871.7<br>1605.1<br>1660.8                             | 11.8        | 0.0 |
|                                                                                     |             |                        | 1102.5665           | 2.2674                 | No MS <sup>2</sup>                                                      | 12.5        | 0.0 |
|  | 3410        | 894.9782               | 894.9786            | 0.4469                 | No MS <sup>2</sup>                                                      | 6.1         | 0.3 |
|                                                                                     |             |                        | 894.9783            | 0.1117                 |                                                                         | 6.6         | 0.1 |

|    | 3500               | 909.9835               | 909.9831            | 0.4396                        | 432.3<br>817.3<br>1062.5<br>1307.8<br>1525.9           | 5.5                | 0.1       |
|-------------------------------------------------------------------------------------|--------------------|------------------------|---------------------|-------------------------------|--------------------------------------------------------|--------------------|-----------|
|    | 3510               | 997.0281               | 997.0317            | 3.6107                        | 817.5<br>826.5<br>1103.8<br>1307.7<br>1787.0           | 6.1                | 0.1       |
|                                                                                     |                    |                        | 997.0309            | 2.8083                        | No MS <sup>2</sup>                                     | 6.5                | 0.2       |
|                                                                                     |                    |                        | 997.0266            | 1.5045                        | 468.3<br>825.5<br>1307.7<br>1525.8<br>1774.8           | 6.7                | 0.1       |
| <b>Glycan Structure</b>                                                             | <b>Glycan code</b> | <b>Theoretical m/z</b> | <b>Observed m/z</b> | <b>Mass accuracy (in ppm)</b> | <b>MS2 ions for structural confirmation</b>            | <b>Average GUI</b> | <b>SD</b> |
|  | 4602               | 997.5161               | 997.5156            | 0.5012                        | 432.2<br>657.9<br>843.8<br>1251.8<br>1719.9            | 7.3                | 0.1       |
|                                                                                     |                    |                        | 997.5156            | 0.5012                        | 432.3<br>450.1<br>844.2<br>858.4<br>915.7<br>1119.7    | 7.5                | 0.2       |
|                                                                                     |                    |                        | 997.5145            | 1.6040                        | No MS <sup>2</sup>                                     | 8.5                | 0.5       |
|  | 5502               | 1011.1916              | 1011.1926           | 0.9889                        | No MS <sup>2</sup>                                     | 8.7                | 0.1       |
|                                                                                     |                    |                        | 1011.1952           | 3.5602                        |                                                        | 9.4                | 0.1       |
|                                                                                     |                    |                        | 1011.1923           | 0.6923                        |                                                        | 10.3               | 0.2       |
|  | 5611               | 1016.8634              | 1016.8619           | 1.4751                        | 432.2<br>464.3<br>1016.6<br>1146.3<br>1164.1<br>1307.7 | 9.7                | 0.1       |

|                                                                                     |             |                        | 1016.8641           | 0.6884                 | 432.3<br>464.3<br>468.3<br>843.6<br>1016.7                                 | 11.2        | 0.0 |
|-------------------------------------------------------------------------------------|-------------|------------------------|---------------------|------------------------|----------------------------------------------------------------------------|-------------|-----|
|                                                                                     |             |                        | 1016.8636           | 0.1967                 | 464.3<br>980.3<br>1016.7<br>1802.0                                         | 11.9        | 0.0 |
|                                                                                     |             |                        | 1016.8647           | 1.2784                 | 464.4<br>697.5<br>1016.7<br>1039.6                                         | 12.5        | 0.1 |
| Glycan Structure                                                                    | Glycan code | Theoretical <i>m/z</i> | Observed <i>m/z</i> | Mass accuracy (in ppm) | MS2 ions for structural confirmation                                       | Average GUI | SD  |
| 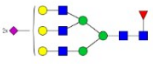 | 5612        | 1137.2546              | 1137.2545           | 0.0879                 | No MS <sup>2</sup>                                                         | 8.4         | 0.0 |
|                                                                                     |             |                        | 1137.2546           | 0.0000                 |                                                                            | 9.1         | 0.1 |
|                                                                                     |             |                        | 1137.2565           | 1.6707                 |                                                                            | 9.3         | 0.0 |
|                                                                                     |             |                        | 1137.2551           | 0.4397                 |                                                                            | 10.1        | 0.0 |
|                                                                                     |             |                        | 1137.2549           | 0.2638                 | 464.3<br>793.5<br>1116.5<br>1284.5<br>1456.3<br>1471.8<br>1518.9<br>1559.8 | 10.2        | 0.3 |
|                                                                                     |             |                        | 1137.2546           | 0.0000                 | 464.3<br>1284.4<br>1742.9<br>1972.0                                        | 11.3        | 0.0 |
|  | 5711        | 1084.8966              | 1084.9011           | 4.1479                 | No MS <sup>2</sup>                                                         | 8.7         | 0.0 |
|                                                                                     |             |                        | 1084.8995           | 2.6731                 | 450.3<br>590.2<br>1066.5<br>1068.0<br>1431.2<br>1472.8<br>1699.8<br>1858.9 | 9.7         | 0.2 |
|                                                                                     |             |                        | 1084.9014           | 4.4244                 | 464.3<br>991.6                                                             | 10.0        | 0.1 |

|                                                                                     |                    |                               |                            |                               | 1049.7<br>1052.5<br>1062.7<br>1272.3<br>1490.9<br>1900.2 |                    |           |
|-------------------------------------------------------------------------------------|--------------------|-------------------------------|----------------------------|-------------------------------|----------------------------------------------------------|--------------------|-----------|
|    | 5720               | 1022.5351                     | 1022.5393                  | 4.1074                        | No MS <sup>2</sup>                                       | 9.8                | 0.3       |
|    | 5721               | 1142.9264                     | 1142.9301                  | 3.2373                        | No MS <sup>2</sup>                                       | 8.3                | 0.1       |
|                                                                                     |                    |                               | 1142.9307                  | 3.7623                        |                                                          | 9.2                | 0.1       |
|                                                                                     |                    |                               | 1142.9310                  | 4.0248                        |                                                          | 10.6               | 0.0       |
| <b>Glycan Structure</b>                                                             | <b>Glycan code</b> | <b>Theoretical <i>m/z</i></b> | <b>Observed <i>m/z</i></b> | <b>Mass accuracy (in ppm)</b> | <b>MS2 ions for structural confirmation</b>              | <b>Average GUI</b> | <b>SD</b> |
|  | 6702               | 921.9772                      | 921.9789                   | 1.8439                        | No MS <sup>2</sup>                                       | 11.3               | 0.1       |
|                                                                                     |                    |                               | 921.9782                   | 1.0846                        | 464.3<br>825.5<br>1282.8<br>1415.0<br>1679.1<br>1988.1   | 12.0               | 0.0       |
|  | 6712               | 1286.9966                     | 1286.9972                  | 0.4662                        | No MS <sup>2</sup>                                       | 11.8               | 0.0       |
|  | 6811               | 926.2310                      | 926.2353                   | 4.6425                        | No MS <sup>2</sup>                                       | 12.0               | 0.0       |



## **Figure Legend**

**Figure S1.** Representation of dextrin ladders alone as well as spiked into serum, separated on three different LC systems. The ladder shows the retention times of GUIs 2 to 10 on different systems.

**Figure S2.** Scatter plot showing reproducibility of GUI values on two different days on **A.** C-18 column **B.** PGC column

**Figure S3.** Scatter plot showing comparison of peak areas between spiked and unspiked samples. The figure shows that the peak areas are comparable, indicating there is no suppression in ionization efficiencies of the permethylated glycans derived from the spiked samples.

**Figure S4.** Scatter plot showing the comparison of GUI values from spiked and unspiked samples. The  $R^2$  value of 0.999 shows the reproducibility of the values between both and unspiked samples, depicting that the samples with the internal standard are not showing variations in GUI.

Gautam *et al.* Figure S1

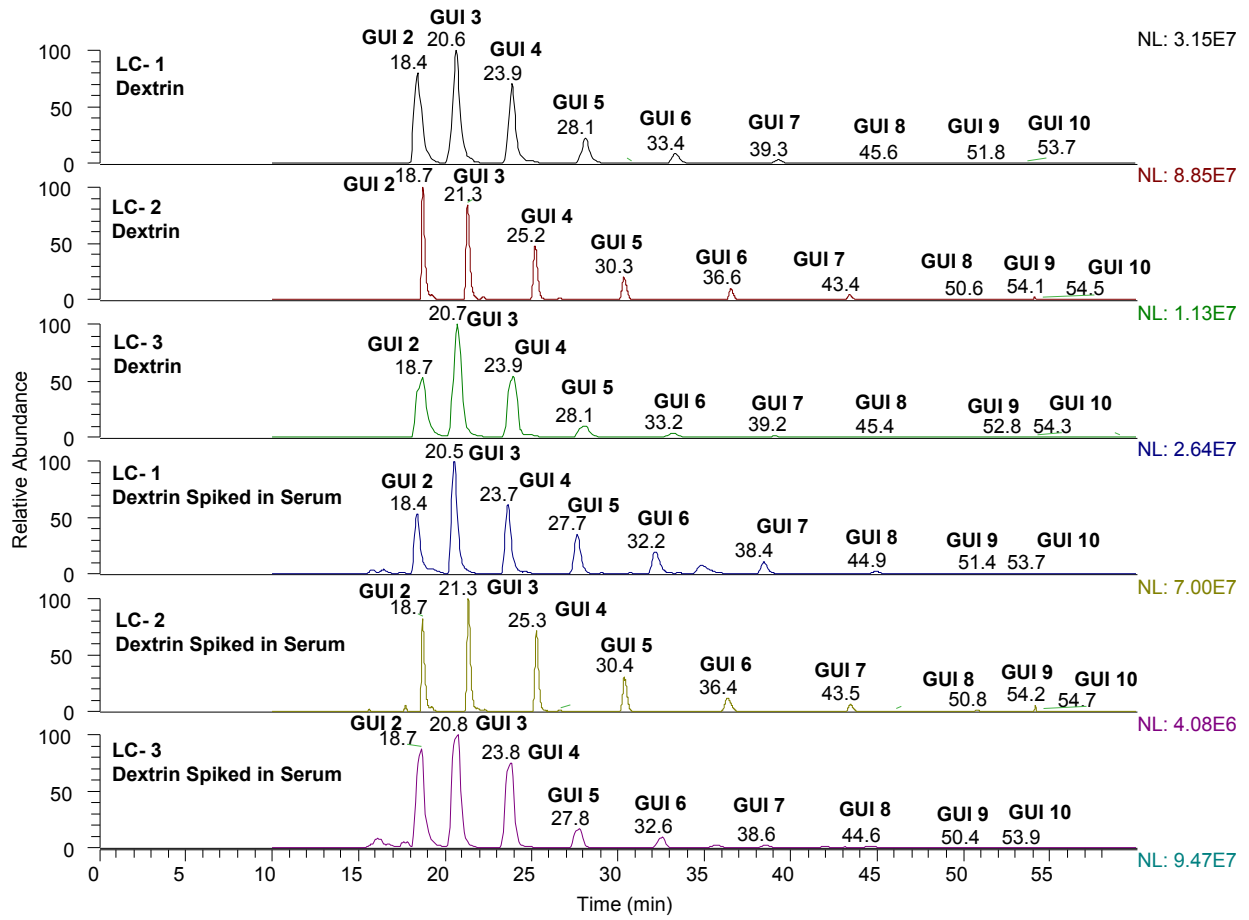

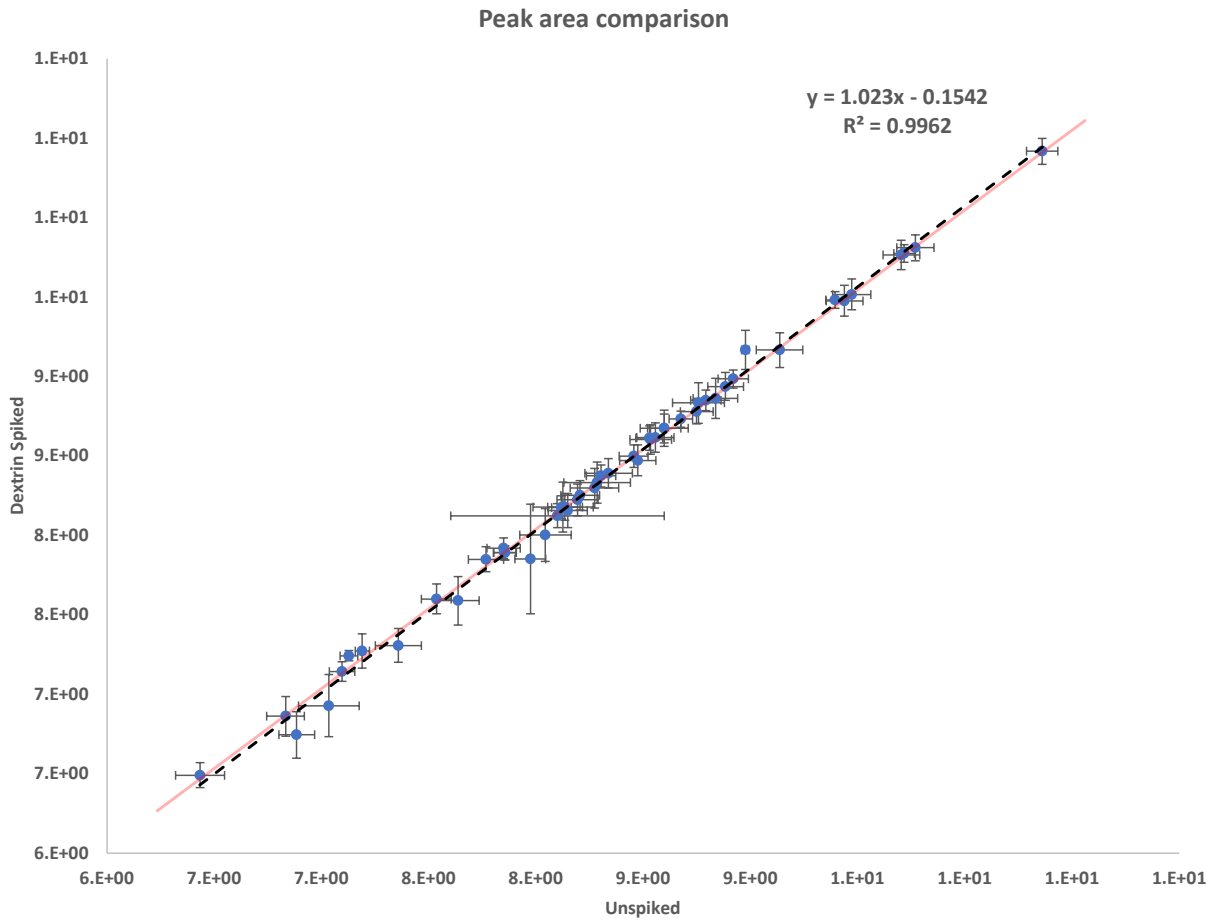

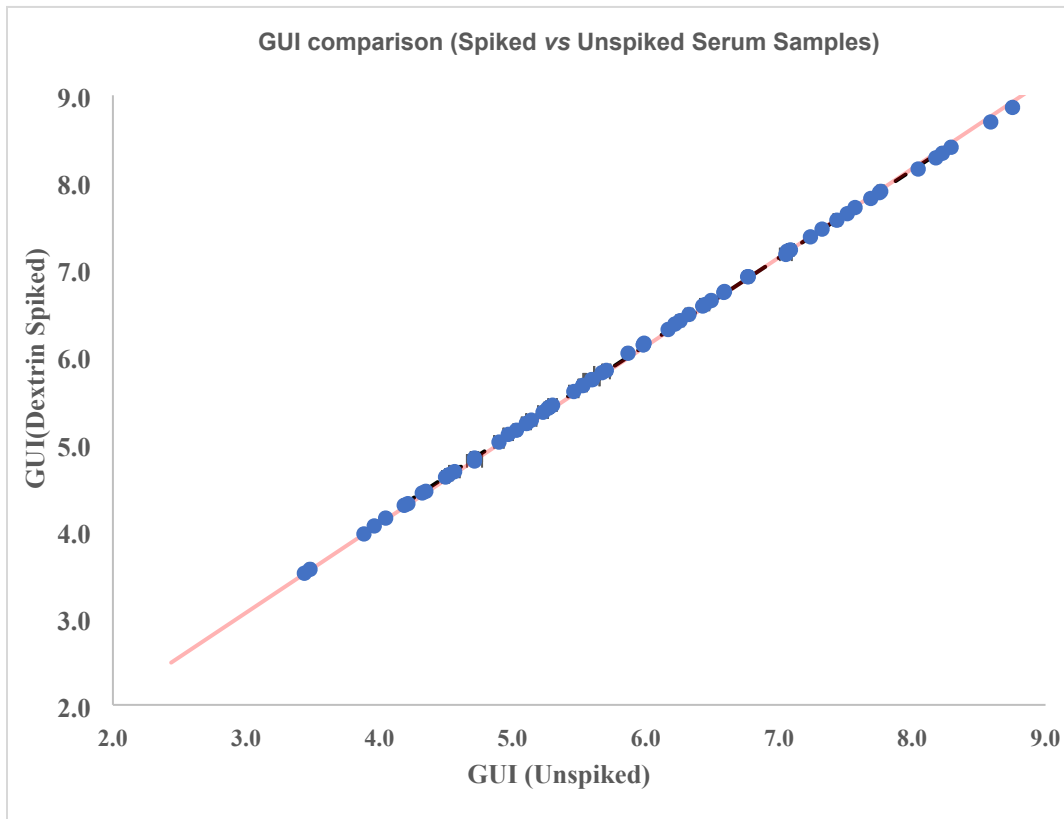

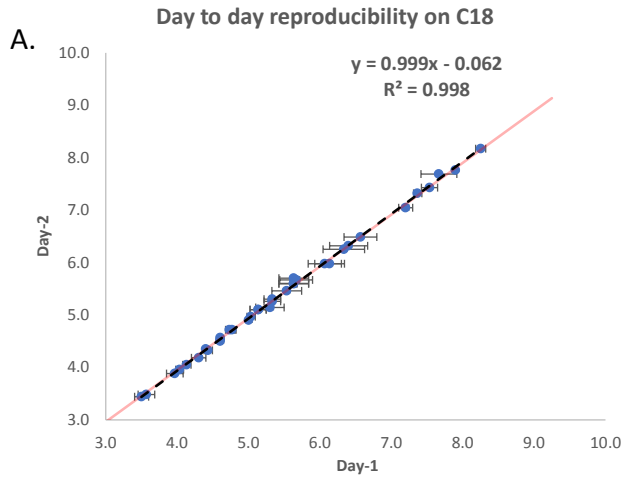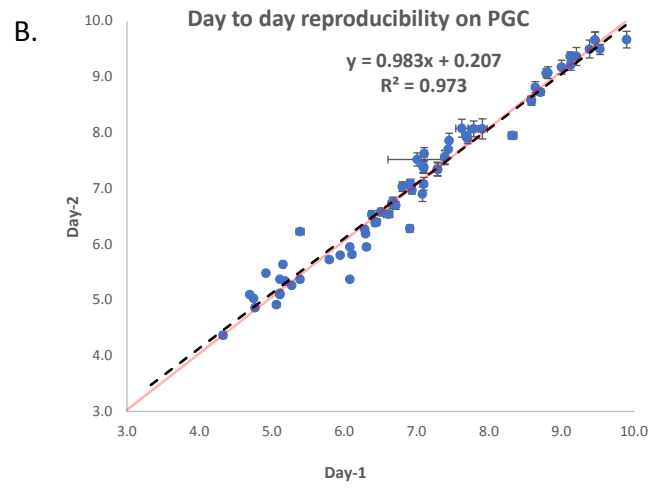

### C18 LC-MS Method for Velos

Sampler.TempCtrl = On  
ColumnOven.TempCtrl = On  
ColumnOven.Temperature.Nominal = 55.0 [°C]  
ColumnOven.Temperature.LowerLimit = 20.0 [°C]  
ColumnOven.Temperature.UpperLimit = 60.0 [°C]  
EquilibrationTime = 1.0 [min]  
ColumnOven.ReadyTempDelta = 5.0 [°C]  
Sampler.Temperature.Nominal = 5.0 [°C]  
Sampler.Temperature.LowerLimit = 4.0 [°C]  
Sampler.Temperature.UpperLimit = 45.0 [°C]  
Sampler.ReadyTempDelta = 2.0 [°C]  
LoadingPump.Pressure.LowerLimit = 0 [psi]  
LoadingPump.Pressure.UpperLimit = 6498 [psi]  
LoadingPump.MaximumFlowRampDown = 1001 [μl/min<sup>2</sup>]  
LoadingPump.MaximumFlowRampUp = 1001 [μl/min<sup>2</sup>]  
LoadingPump.%A.Equate = "%A"  
LoadingPump.%B.Equate = "%B"  
%C.Equate = "%C"  
NC\_Pump.Pressure.LowerLimit = 0 [psi]  
NC\_Pump.Pressure.UpperLimit = 11603 [psi]  
NC\_Pump.MaximumFlowRampDown = 999.996 [μl/min<sup>2</sup>]  
NC\_Pump.MaximumFlowRampUp = 999.996 [μl/min<sup>2</sup>]  
NC\_Pump.%A.Equate = "%A"  
NC\_Pump.%B.Equate = "%B"  
DrawSpeed = 1000 [nl/s]  
DrawDelay = 20000 [ms]  
DispSpeed = 1000 [nl/s]  
DispenseDelay = 20000 [ms]  
WasteSpeed = 5000 [nl/s]  
WashSpeed = 8000 [nl/s]  
LoopWashFactor = 2.000  
SampleHeight = 1.000 [mm]  
PunctureDepth = 11.000 [mm]  
WashVolume = 50.000 [μl]  
RinseBetweenReinjections = No  
LowDispersionMode = Off  
InjectMode = ulPickUp  
FirstTransportVial = R1  
LastTransportVial = R1  
TransportVialCapacity = 10000  
TransLiquidHeight = 10.000 [mm]  
TransVialPunctureDepth = 11.000 [mm]  
FlushVolume = 5.000 [μl]  
LoadingPump.Flow = 3.000 [μl/min]  
LoadingPump.%B = 0.0 [%]  
%C = 0.0 [%]  
LoadingPump.Curve = 5  
MSInject.State Off

ValveRight = 1\_2

0.000 Wait LoadingPump.Ready and NC\_Pump.Ready and ColumnOven.Ready and  
Sampler.Ready and PumpModule.Ready

;Chromeleon sets this property to signal to Xcalibur that it is ready to start a run.

ReadyToRun = 1

;Xcalibur sets this property to start the run or injection.

Wait StartRun

NC\_Pump.Flow = 0.350 [µl/min]

NC\_Pump.%B = 20.0 [%]

Wait LoadingPump.Ready and NC\_Pump.Ready and ColumnOven.Ready and  
Sampler.Ready and PumpModule.Ready

Inject

InjectResponse = 1

;Chromeleon sets this property to signal the injection to Xcalibur.

;Depending on your system configuration it might be necessary to manually insert

;a "Relay" command below in order to send the start signal to the MS.

;Typical syntaxes:

;Pump\_Relay\_1.Closed Duration = 2.00

;UM3PUMP\_Relay1.On Duration = 2.00

MSInject.On Duration= 0.01

;Pump\_Relay\_1.Closed Duration =2.00

;UM3PUMP\_Relay1.On Duration = 2.00

NC\_Pump.Flow = 0.350 [µl/min]

NC\_Pump.%B = 20.0 [%]

WASH

0.100 MSInject.Off Duration= 0.01

10.000 NC\_Pump.Flow = 0.350 [µl/min]

NC\_Pump.%B = 20.0 [%]

ValveRight = 10\_1

11.000 NC\_Pump.Flow = 0.350 [µl/min]

NC\_Pump.%B = 42.0 [%]

48.000 NC\_Pump.Flow = 0.350 [µl/min]

NC\_Pump.%B = 55.0 [%]

49.000 NC\_Pump.Flow = 0.350 [µl/min]

NC\_Pump.%B = 90.0 [%]

54.000 NC\_Pump.Flow = 0.350 [µl/min]

NC\_Pump.%B = 90.0 [%]

55.000 NC\_Pump.Flow = 0.350 [µl/min]

NC\_Pump.%B = 20.0 [%]

ValveRight = 1\_2

60.000

NC\_Pump.Flow = 0.350 [ $\mu$ l/min]

NC\_Pump.%B = 20.0 [%]

InjectResponse = 0

End



## MS Method

Creator: LTQ Orbitrap Velos

MS Run Time (min): 60.00

Sequence override of method parameters not enabled.

Divert Valve: not used during run

Contact Closure: not used during run

Syringe Pump: not used during run

MS Detector Settings:

Acquisition Start Delay (min): 10.00

Real-time modifications to method disabled

Stepped collision energy not enabled

Additional Microscans:

MS2 0 0

MS3 0 0

MS4 0 0

MS5 0 0

MS6 0 0

MS7 0 0

MS8 0 0

MS9 0 0

MS10 0 0

Experiment Type: Nth Order Double Play With ETD

Tune Method: nanoESI\_08242017

Scan Event Details:

1: FTMS + p norm !corona !pi o(200.0-2000.0)

CV = 0.0V

2: ITMS + c norm Dep MS/MS Most intense ion from (1)

Activation Type: CID

Min. Signal Required: 5000.0

Isolation Width: 3.00

Normalized Coll. Energy: 30.0

Default Charge State: 2

Activation Q: 0.250

Activation Time: 15.000

CV = 0.0V

3: FTMS + c norm Dep MS/MS Most intense ion from (1)

Activation Type: HCD

Min. Signal Required: 1000.0

Isolation Width: 3.00

Normalized Coll. Energy: 45.0

Default Charge State: 2

Activation Time: 0.100

FT first mass mode: fixed at m/z

FT first mass value: 100.00

CV = 0.0V

Scan Event 2 and 3 repeated for top 4 peaks.

Lock Masses:

Pos List Name: N/A  
Source: API Source  
Mass List: (none)  
Neg List Name: N/A  
Source: API Source  
Mass List: (none)

#### Data Dependent Settings:

Use separate polarity settings disabled

Parent Mass List: (none)

Reject Mass List: (none)

Neutral Loss Mass List: (none)

Product Mass List: (none)

Neutral loss in top: 3

Product in top: 3

Most intense if no parent masses found not enabled

Add/subtract mass not enabled

FT master scan preview mode enabled

Charge state screening enabled

Charge state dependent ETD time not enabled

Monoisotopic precursor selection enabled

Non-peptide monoisotopic recognition enabled

Charge state rejection enabled

Unassigned charge states : rejected

Charge state 1 : rejected

Charge state 2 : not rejected

Charge state 3 : not rejected

Charge states 4+ : not rejected

Chromatography mode is disabled

Global Data Dependent Settings:

Predict ion injection time enabled

Use global parent and reject mass lists not enabled

Exclude parent mass from data dependent selection not enabled

Exclusion mass width by mass

Exclusion mass width low: 1.50

Exclusion mass width high: 1.50

Parent mass width by mass

Parent mass width low: 1.50

Parent mass width high: 1.50

Reject mass width by mass

Reject mass width low: 1.50

Reject mass width high: 1.50

Zoom/UltraZoom scan mass width by mass

Zoom/UltraZoom scan mass width low: 5.00

Zoom/UltraZoom scan mass width high: 5.00

FT SIM scan mass width low: 5.00

FT SIM scan mass width high: 5.00

Neutral Loss candidates processed by decreasing intensity

Neutral Loss mass width by mass

Neutral Loss mass width low: 0.50

Neutral Loss mass width high: 0.50

Product candidates processed by decreasing intensity

Product mass width by mass

Product mass width low: 0.50

Product mass width high: 0.50

MS mass range: 0.00-1000000.00

MSn mass range by mass

MSn mass range: 0.00-1000000.00

Use m/z values as masses not enabled

Analog UV data dep. not enabled

Dynamic exclusion enabled

Repeat Count: 2

Repeat Duration: 30.00

Exclusion List Size: 50

Exclusion Duration: 60.00

Exclusion mass width by mass

Exclusion mass width low: 1.50

Exclusion mass width high: 1.50

Expiration: disabled

Isotopic data dependence not enabled

Custom Data Dependent Settings:

Not enabled

## C18 LC-MS Method for Exactive

LoadingPump.Pressure.LowerLimit =0 [psi]  
ColumnOven.TempCtrl = On  
ColumnOven.Temperature.Nominal =55.0 [°C]  
ColumnOven.Temperature.LowerLimit =20.0 [°C]  
ColumnOven.Temperature.UpperLimit =60.0 [°C]  
EquilibrationTime = 1.0 [min]  
ColumnOven.ReadyTempDelta = 5.0 [°C]  
LoadingPump.Pressure.UpperLimit =5000 [psi]  
LoadingPump.MaximumFlowRampDown =1001 [µl/min<sup>2</sup>]  
LoadingPump.MaximumFlowRampUp =1001 [µl/min<sup>2</sup>]  
LoadingPump.%A.Equate = "%A"  
LoadingPump.%B.Equate = "%B"  
%C.Equate = "%C"  
NC\_Pump.Pressure.LowerLimit = 0 [psi]  
NC\_Pump.Pressure.UpperLimit = 7000 [psi]  
NC\_Pump.MaximumFlowRampDown = 999.996 [µl/min<sup>2</sup>]  
NC\_Pump.MaximumFlowRampUp = 999.996 [µl/min<sup>2</sup>]  
NC\_Pump.%A.Equate = "%A"  
NC\_Pump.%B.Equate = "%B"  
DrawSpeed = 1000 [nl/s]  
DrawDelay = 20000 [ms]  
DispSpeed = 1000 [nl/s]  
DispenseDelay = 20000 [ms]  
WasteSpeed = 5000 [nl/s]  
WashSpeed = 8000 [nl/s]  
LoopWashFactor = 2.000  
SampleHeight = 2.000 [mm]  
PunctureDepth = 11.000 [mm]  
WashVolume = 50.000 [µl]  
RinseBetweenReinjections = No  
LowDispersionMode = Off  
InjectMode = ulPickUp  
FirstTransportVial = R1  
LastTransportVial = R1  
TransportVialCapacity = 10000  
TransLiquidHeight = 10.000 [mm]  
TransVialPunctureDepth = 10.000 [mm]  
FlushVolume = 5.000 [µl]  
LoadingPump.Flow = 3.000 [µl/min]  
LoadingPump.%B = 0.0 [%]  
%C = 0.0 [%]  
LoadingPump.Curve = 5  
ValveRight = 1\_2  
Relay\_4.State Off

0.000 Wait LoadingPump.Ready and NC\_Pump.Ready and ColumnOven.Ready  
and Sampler.Ready and PumpModule.Ready

```

;Chromeleon sets this property to signal to Xcalibur that it is ready to start a run.
ReadyToRun = 1
;Xcalibur sets this property to start the run or injection.
Wait StartRun
NC_Pump.Flow = 0.350 [µl/min]
NC_Pump.%B = 20.0 [%]
Wait LoadingPump.Ready and NC_Pump.Ready and ColumnOven.Ready
and Sampler.Ready and PumpModule.Ready
Inject
InjectResponse = 1
;Chromeleon sets this property to signal the injection to Xcalibur.
;Depending on your system configuration it might be necessary to manually insert
;a "Relay" command below in order to send the start signal to the MS.
;Typical syntaxes:
;Pump_Relay_1.Closed Duration =2.00
;UM3PUMP_Relay1.On Duration = 2.00
Relay_4.On Duration= 0.01
;Pump_Relay_1.Closed Duration =2.00
;UM3PUMP_Relay1.On Duration = 2.00
NC_Pump.Flow = 0.350 [µl/min]
ValveRight = 1_2
NC_Pump.%B = 20.0 [%]

0.001 Relay_4.Off Duration= 0.01

10.000 NC_Pump.Flow = 0.350 [µl/min]
NC_Pump.%B = 20.0 [%]
ValveRight = 10_1

11.000 NC_Pump.Flow = 0.350 [µl/min]
NC_Pump.%B = 42.0 [%]

48.000 NC_Pump.Flow = 0.350 [µl/min]
NC_Pump.%B = 55.0 [%]

49.000 NC_Pump.Flow = 0.350 [µl/min]
NC_Pump.%B = 90.0 [%]

54.000 NC_Pump.Flow = 0.350 [µl/min]
NC_Pump.%B = 90.0 [%]

55.000 ValveRight = 1_2
NC_Pump.Flow = 0.350 [µl/min]
NC_Pump.%B = 20.0 [%]

60.000 NC_Pump.Flow = 0.350 [µl/min]
NC_Pump.%B = 20.0 [%]
InjectResponse = 0
End

```





## MS Method

### Run settings

Start delay 10.00 min

---

### Orbitrap MS Detector

Acquisition time 50.00 min

Segment 1 50.00 min duration at 10.00

Tune file C:\Xcalibur\methods\NanoESI Positive Cal 1022018.ms

tune

Lock masses Off

Event 1: Positive; 1 scans; R=50,000; AGC=1,000,000;  
Inject=100.00 ms; [300.0 - 2,000.0]; In-Source CID  
disabled

---

Syringe pump not driven

---

### Divert valves

Divert valve 1 not driven

Divert valve 2 not driven

---

Contact closure not provided

## PGC LC-MS Method for Velos

Sampler.TempCtrl = On  
ColumnOven.TempCtrl = On  
ColumnOven.Temperature.Nominal = 75.0 [°C]  
ColumnOven.Temperature.LowerLimit = 20.0 [°C]  
ColumnOven.Temperature.UpperLimit = 75.0 [°C]  
EquilibrationTime = 1.0 [min]  
ColumnOven.ReadyTempDelta = 5.0 [°C]  
Sampler.Temperature.Nominal = 5.0 [°C]  
Sampler.Temperature.LowerLimit = 4.0 [°C]  
Sampler.Temperature.UpperLimit = 45.0 [°C]  
Sampler.ReadyTempDelta = 2.0 [°C]  
LoadingPump.Pressure.LowerLimit = 0 [psi]  
LoadingPump.Pressure.UpperLimit = 6498 [psi]  
LoadingPump.MaximumFlowRampDown = 1001 [µl/min<sup>2</sup>]  
LoadingPump.MaximumFlowRampUp = 1001 [µl/min<sup>2</sup>]  
LoadingPump.%A.Equate = "%A"  
LoadingPump.%B.Equate = "%B"  
%C.Equate = "%C"  
NC\_Pump.Pressure.LowerLimit = 0 [psi]  
NC\_Pump.Pressure.UpperLimit = 11603 [psi]  
NC\_Pump.MaximumFlowRampDown = 999.996 [µl/min<sup>2</sup>]  
NC\_Pump.MaximumFlowRampUp = 999.996 [µl/min<sup>2</sup>]  
NC\_Pump.%A.Equate = "%A"  
NC\_Pump.%B.Equate = "%B"  
DrawSpeed = 1000 [nl/s]  
DrawDelay = 20000 [ms]  
DispSpeed = 1000 [nl/s]  
DispenseDelay = 20000 [ms]  
WasteSpeed = 5000 [nl/s]  
WashSpeed = 8000 [nl/s]  
LoopWashFactor = 2.000  
SampleHeight = 1.000 [mm]  
PunctureDepth = 11.000 [mm]  
WashVolume = 50.000 [µl]  
RinseBetweenReinjections = No  
LowDispersionMode = Off  
InjectMode = ulPickUp  
FirstTransportVial = R1  
LastTransportVial = R1  
TransportVialCapacity = 10000  
TransLiquidHeight = 10.000 [mm]  
TransVialPunctureDepth = 11.000 [mm]  
FlushVolume = 5.000 [µl]  
LoadingPump.Flow = 3.000 [µl/min]  
LoadingPump.%B = 0.0 [%]  
%C = 0.0 [%]  
LoadingPump.Curve = 5  
ValveRight = 1\_2

```

0.000 Wait          LoadingPump.Ready and NC_Pump.Ready and ColumnOven.Ready
and Sampler.Ready and PumpModule.Ready
;Chromleon sets this property to signal to Xcalibur that it is ready to start a run.
ReadyToRun =      1
;Xcalibur sets this property to start the run or injection.
Wait          StartRun
NC_Pump.Flow =   0.600 [µl/min]
NC_Pump.%B =     20.0 [%]
Wait          LoadingPump.Ready and NC_Pump.Ready and ColumnOven.Ready
and Sampler.Ready and PumpModule.Ready
Inject
InjectResponse = 1
;Chromleon sets this property to signal the injection to Xcalibur.
;Depending on your system configuration it might be necessary to manually insert
;a "Relay" command below in order to send the start signal to the MS.
;Typical syntaxes:
;Pump_Relay_1.Closed Duration = 2.00
;UM3PUMP_Relay1.On Duration = 2.00

MSInject.On Duration= 0.10
;Pump_Relay_1.Closed Duration =2.00
;UM3PUMP_Relay1.On Duration = 2.00
NC_Pump.Flow =   0.600 [µl/min]
NC_Pump.%B =     20.0 [%]
WASH

10.000 NC_Pump.Flow = 0.600 [µl/min]
NC_Pump.%B = 20.0 [%]
ValveRight = 10_1

20.000 NC_Pump.Flow = 0.600 [µl/min]
NC_Pump.%B = 60.0 [%]

40.000 NC_Pump.Flow = 0.600 [µl/min]
NC_Pump.%B = 85.0 [%]

60.000 NC_Pump.Flow = 0.600 [µl/min]
NC_Pump.%B = 95.0 [%]

87.000 NC_Pump.Flow = 0.600 [µl/min]
NC_Pump.%B = 95.0 [%]
ValveRight = 1_2

88.000 NC_Pump.Flow = 0.600 [µl/min]
NC_Pump.%B = 20.0 [%]

90.000 NC_Pump.Flow = 0.600 [µl/min]
NC_Pump.%B = 20.0 [%]

```

```
InjectResponse = 0  
End
```

## MS Method

Creator: LTQ Orbitrap Velos

MS Run Time (min): 90.00

Sequence override of method parameters not enabled.

Divert Valve: not used during run

Contact Closure: not used during run

Syringe Pump: not used during run

MS Detector Settings:

Acquisition Start Delay (min): 10.00

Real-time modifications to method disabled

Stepped collision energy not enabled

Additional Microscans:

MS2 0 0

MS3 0 0

MS4 0 0

MS5 0 0

MS6 0 0

MS7 0 0

MS8 0 0

MS9 0 0

MS10 0 0

Experiment Type: Nth Order Double Play With ETD

Tune Method: nanoESI\_08242017

Scan Event Details:

1: FTMS + p norm !corona !pi o(200.0-2000.0)

CV = 0.0V

2: ITMS + c norm Dep MS/MS Most intense ion from (1)

Activation Type: CID

Min. Signal Required: 5000.0

Isolation Width: 3.00

Normalized Coll. Energy: 30.0

Default Charge State: 2

Activation Q: 0.250

Activation Time: 15.000

CV = 0.0V

3: FTMS + c norm Dep MS/MS Most intense ion from (1)

Activation Type: HCD

Min. Signal Required: 1000.0

Isolation Width: 3.00

Normalized Coll. Energy: 45.0

Default Charge State: 2

Activation Time: 0.100

FT first mass mode: fixed at m/z

FT first mass value: 100.00

CV = 0.0V

Scan Event 2 and 3 repeated for top 6 peaks.

Lock Masses:

Pos List Name: N/A  
Source: API Source  
Mass List: (none)  
Neg List Name: N/A  
Source: API Source  
Mass List: (none)

Data Dependent Settings:

Use separate polarity settings disabled  
Parent Mass List: (none)  
Reject Mass List: (none)  
Neutral Loss Mass List: (none)  
Product Mass List: (none)  
Neutral loss in top: 3  
Product in top: 3  
Most intense if no parent masses found not enabled  
Add/subtract mass not enabled  
FT master scan preview mode enabled  
Charge state screening not enabled  
Charge state dependent ETD time not enabled  
Monoisotopic precursor selection not enabled  
Non-peptide monoisotopic recognition not enabled  
Charge state rejection enabled  
Unassigned charge states : rejected  
Charge state 1 : rejected  
Charge state 2 : not rejected  
Charge state 3 : not rejected  
Charge states 4+ : not rejected  
Chromatography mode is disabled

Global Data Dependent Settings:

Predict ion injection time enabled

Use global parent and reject mass lists not enabled

Exclude parent mass from data dependent selection not enabled

Exclusion mass width by mass

Exclusion mass width low: 1.50

Exclusion mass width high: 1.50

Parent mass width by mass

Parent mass width low: 1.50

Parent mass width high: 1.50

Reject mass width by mass

Reject mass width low: 1.50

Reject mass width high: 1.50

Zoom/UltraZoom scan mass width by mass

Zoom/UltraZoom scan mass width low: 5.00

Zoom/UltraZoom scan mass width high: 5.00

FT SIM scan mass width low: 5.00

FT SIM scan mass width high: 5.00

Neutral Loss candidates processed by decreasing intensity

Neutral Loss mass width by mass

Neutral Loss mass width low: 0.50

Neutral Loss mass width high: 0.50

Product candidates processed by decreasing intensity

Product mass width by mass

Product mass width low: 0.50

Product mass width high: 0.50

MS mass range: 0.00-1000000.00

MSn mass range by mass

MSn mass range: 0.00-1000000.00



Use m/z values as masses not enabled

Analog UV data dep. not enabled

Dynamic exclusion enabled

Repeat Count: 2

Repeat Duration: 10.00

Exclusion List Size: 50

Exclusion Duration: 10.00

Exclusion mass width by mass

Exclusion mass width low: 1.50

Exclusion mass width high: 1.50

Expiration: disabled

Isotopic data dependence not enabled

Custom Data Dependent Settings:

Not enabled

## PGC LC-MS Method for Exactive

LoadingPump.Pressure.LowerLimit =0 [psi]  
ColumnOven.TempCtrl = On  
ColumnOven.Temperature.Nominal =75.0 [°C]  
ColumnOven.Temperature.LowerLimit =20.0 [°C]  
ColumnOven.Temperature.UpperLimit =75.0 [°C]  
EquilibrationTime = 1.0 [min]  
ColumnOven.ReadyTempDelta = 5.0 [°C]  
LoadingPump.Pressure.UpperLimit =5000 [psi]  
LoadingPump.MaximumFlowRampDown =1001 [µl/min<sup>2</sup>]  
LoadingPump.MaximumFlowRampUp =1001 [µl/min<sup>2</sup>]  
LoadingPump.%A.Equate = "%A"  
LoadingPump.%B.Equate = "%B"  
%C.Equate = "%C"  
NC\_Pump.Pressure.LowerLimit = 0 [psi]  
NC\_Pump.Pressure.UpperLimit = 7000 [psi]  
NC\_Pump.MaximumFlowRampDown = 999.996 [µl/min<sup>2</sup>]  
NC\_Pump.MaximumFlowRampUp = 999.996 [µl/min<sup>2</sup>]  
NC\_Pump.%A.Equate = "%A"  
NC\_Pump.%B.Equate = "%B"  
DrawSpeed = 1000 [nl/s]  
DrawDelay = 20000 [ms]  
DispSpeed = 1000 [nl/s]  
DispenseDelay = 20000 [ms]  
WasteSpeed = 5000 [nl/s]  
WashSpeed = 8000 [nl/s]  
LoopWashFactor = 2.000  
SampleHeight = 2.000 [mm]  
PunctureDepth = 11.000 [mm]  
WashVolume = 50.000 [µl]  
RinseBetweenReinjections = No  
LowDispersionMode = Off  
InjectMode = ulPickUp  
FirstTransportVial = R1  
LastTransportVial = R1  
TransportVialCapacity = 10000  
TransLiquidHeight = 10.000 [mm]  
TransVialPunctureDepth = 10.000 [mm]  
FlushVolume = 5.000 [µl]  
LoadingPump.Flow = 3.000 [µl/min]  
LoadingPump.%B = 0.0 [%]  
%C = 0.0 [%]  
LoadingPump.Curve = 5  
ValveRight = 1\_2  
Relay\_4.State Off

0.000 Wait LoadingPump.Ready and NC\_Pump.Ready and ColumnOven.Ready  
and Sampler.Ready and PumpModule.Ready

```

;Chromeleon sets this property to signal to Xcalibur that it is ready to start a run.
ReadyToRun =          1
;Xcalibur sets this property to start the run or injection.
Wait          StartRun
NC_Pump.Flow =        0.600 [µl/min]
NC_Pump.%B =          20.0 [%]
Wait          LoadingPump.Ready and NC_Pump.Ready and ColumnOven.Ready
and Sampler.Ready and PumpModule.Ready
Inject
InjectResponse =      1
;Chromeleon sets this property to signal the injection to Xcalibur.
;Depending on your system configuration it might be necessary to manually insert
;a "Relay" command below in order to send the start signal to the MS.
;Typical syntaxes:
;Pump_Relay_1.Closed Duration =2.00
;UM3PUMP_Relay1.On Duration = 2.00
Relay_4.On Duration=   0.01
;Pump_Relay_1.Closed Duration =2.00
;UM3PUMP_Relay1.On Duration = 2.00
NC_Pump.Flow =        0.600 [µl/min]
ValveRight =          1_2
NC_Pump.%B =          20.0 [%]

0.001 Relay_4.Off Duration=   0.01

10.000 NC_Pump.Flow =        0.600 [µl/min]
      NC_Pump.%B =          20.0 [%]
      ValveRight =          10_1

20.000 NC_Pump.Flow =        0.600 [µl/min]
      NC_Pump.%B =          50.0 [%]

40.000 NC_Pump.Flow =        0.600 [µl/min]
      NC_Pump.%B =          80.0 [%]

60.000 NC_Pump.Flow =        0.600 [µl/min]
      NC_Pump.%B =          95.0 [%]

87.000 NC_Pump.Flow =        0.600 [µl/min]
      NC_Pump.%B =          95.0 [%]

88.000 NC_Pump.Flow =        0.600 [µl/min]
      NC_Pump.%B =          20.0 [%]

89.000 ValveRight =          1_2

90.000 NC_Pump.Flow =        0.600 [µl/min]
      NC_Pump.%B =          20.0 [%]
      InjectResponse =      0

```

End

## MS Method

### Run settings

Start delay 10.00 min

---

### Orbitrap MS Detector

Acquisition time 90.00 min

Segment 1 90.00 min duration at 10.00

Tune file C:\Xcalibur\methods\nanoESI\_positive\_20181116.mstu

ne

Lock masses Off

Event 1: Positive; 1 scans; R=100,000; AGC=1,000,000;  
Inject=100.00 ms; [150.0 - 2,000.0]; In-Source CID  
disabled

---

Syringe pump not driven

---

### Divert valves

Divert valve 1 not driven

Divert valve 2 not driven

---

Contact closure not provided

**Instrumental Software:**

- LTQ Tune Plus Version 2.6.0.1065 SP3 for LTQ Orbitrap Velos™ (Thermo Scientific). Xcalibur 2.1.0 SP1.1160 (Thermo Scientific). Chromeleon® chromatography management systems; Version 6.80 SR13 Build 3818. Manufactured by Dionex Corporation (Thermo Fisher Scientific).
- Exactive Software Version 1.1 SP6 Build 1360 (Thermo Scientific). Xcalibur 2.2 SP1.48 (Thermo Scientific), Chromeleon® chromatography management systems. Version 6.80 SR13 Build 3818. Manufactured by Dionex Corporation (Thermo Fisher Scientific).
